# Supplementary material for: The disproportionate burden of pulmonary arterial hypertension among the elderly: global, regional, and national trends from 1990 to 2021—findings from the 2021 global burden of disease study
Source: Front Cardiovasc Med. 2025 Jul 8;12:1564785. doi: 10.3389/fcvm.2025.1564785 (PMC12279824; doi:10.3389/fcvm.2025.1564785)
Supplement: Supplementary file 1 [file Datasheet1.xlsx]

## Sheet: Tab.S1
	TableS1.Checklist of information that should be included in new reports of global health estimates
	#	Checklist item	Reported on page #
	Objectives and funding
	1	Define the indicator(s), populations (including age, sex, and geographic entities), and time period(s) for which estimates were made.	Main text (Methods)
	2	List the funding sources for the work.	Funding
	Data Inputs
	For all data inputs from multiple sources that are synthesized as part of the study:
	3	Describe how the data were identified and how the data were accessed.	Main text (Methods)and appendix
	4	Specify the inclusion and exclusion criteria. Identify all ad-hoc exclusions.	Main text (Methods)and appendix
	5	Provide information on all included data sources and their main characteristics. For each data source used, report reference information or contact name/institution, population represented, data collection method, year(s) of data collection, sex and age range,diagnostic criteria or measurement method, and sample size, as relevant.	Data Input Sources Tool: http://ghdx.h ealthdata.org /gbd2021/dat a-input sources
	6	Identify and describe any categories of input data that have potentially important biases (e.g., based on characteristics listed in item 5).	Main text (Methods)and appendix
	For data inputs that contribute to the analysis but were not synthesized as part of the study:
	7	Describe and give sources for any other data inputs.	Data Input Sources Tool: http://ghdx.h ealthdata.org /gbd2021/dat a-input sources
	For all data inputs:
	8	Provide all data inputs in a file format from which data can be efficiently extracted (e.g., a spreadsheet rather than a PDF), including all relevant meta-data listed in item 5. For any data inputs that cannot be shared because of ethical or legal reasons, such as third-party ownership, provide a contact name or the name of the institution that retains the right to the data.	Main text (Methods) and appendix
	Data analysis
	9	Provide a conceptual overview of the data analysis method. A diagram may be helpful.	Main text (Methods) and appendix
	10	Provide a detailed description of all steps of the analysis, including mathematicalformulae. This description should cover, as relevant, data cleaning, data pre-processing, data adjustments and weighting of data sources, and mathematical or statistical model(s).	Main text (Methods) and appendix
	11	Describe how candidate models were evaluated and how the final model(s) were selected.	Previously published in capstone paper
	12	Provide the results of an evaluation of model performance, if done, as well as the results of any relevant sensitivity analysis.	Previously published in capstone paper
	13	Describe methods for calculating uncertainty of the estimates. State which sources of uncertainty were, and were not, accounted for in the uncertainty analysis.	Main text (Methods) and appendix
	14	State how analytic or statistical source code used to generate estimates can be accessed.	Data Input Sources Tool: http://ghdx.h ealthdata.org /gbd2021/dat a-input sources
	Results and Discussion
	15	Provide published estimates in a file format from which data can be efficiently extracted.	Main text (Methods) and appendix
	16	Report a quantitative measure of the uncertainty of the estimates (e.g. uncertainty intervals).	Main text (Methods) and appendix
	17	Interpret results in light of existing evidence. If updating a previous set of estimates, describe the reasons for changes in estimates.	Main text (Methods) and appendix
	18	Discuss limitations of the estimates. Include a discussion of any modelling assumptions or data limitations that affect interpretation of the estimates.	Main text (Methods) and appendix
	This checklist should be used in conjunction with the GATHER statement and Explanation and Elaboration document, found on gather-statement.org

## Sheet: Tab.S2
Table S2. The Disease burden data of PAH in countries/territories(1990 to 2021)
GBD data	Incidence					Deaths					DALYs
	1990		2021		EAPC（1990-2021）(95% CI)	1990		2021		EAPC（1990-2021）(95% CI)	1990		2021		EAPC（1990-2021）(95% CI)
	All ages（numbers）	Age-standardised rate（per 100,000 people）	All ages（numbers）	Age-standardised rate（per 100,000 people）		All ages（numbers）	Age-standardised rate（per 100,000 people）	All ages（numbers）	Age-standardised rate（per 100,000 people）		All ages（numbers）	Age-standardised rate（per 100,000 people）	All ages（numbers）	Age-standardised rate（per 100,000 people）
Republic of the Union of Myanmar	485.42(394.50,595.33)	1.56(1.26,1.91)	858.20(680.88,1058.54)	1.58(1.27,1.93)	0.13(-0.02,0.28)	70.05(37.17,150.73)	0.22(0.12,0.55)	75.38(48.28,178.16)	0.15(0.10,0.42)	-1.43(-1.58,-1.27)	4138.50(1916.28,10101.62)	10.14(5.16,22.81)	3636.27(2377.29,7103.61)	6.76(4.43,13.78)	-1.54(-1.72,-1.37)
Malaysia	257.45(211.40,322.07)	1.86(1.52,2.28)	594.05(479.09,737.17)	1.85(1.50,2.26)	0.07(0.01,0.12)	10.05(6.73,30.29)	0.08(0.05,0.30)	19.15(11.46,64.87)	0.07(0.04,0.26)	-0.37(-0.57,-0.16)	510.72(367.27,1189.17)	3.22(2.26,8.39)	757.20(518.62,1870.73)	2.48(1.66,6.63)	-0.55(-0.83,-0.27)
Kingdom of Cambodia	109.71(89.65,136.69)	1.60(1.29,1.95)	245.08(196.80,301.03)	1.60(1.29,1.94)	0.07(-0.04,0.18)	11.88(6.04,25.82)	0.16(0.08,0.43)	16.81(10.07,38.10)	0.13(0.07,0.35)	-0.85(-0.89,-0.80)	722.37(350.93,1695.10)	6.65(3.49,14.12)	776.58(499.93,1512.88)	4.92(3.12,10.08)	-1.10(-1.16,-1.04)
Lao People's Democratic Republic	50.51(41.20,62.96)	1.73(1.40,2.13)	126.49(102.63,157.26)	2.02(1.64,2.44)	0.55(0.34,0.75)	7.58(2.79,18.98)	0.23(0.11,0.54)	8.76(4.79,20.04)	0.15(0.09,0.36)	-1.43(-1.52,-1.35)	478.66(153.71,1319.52)	9.96(3.82,24.56)	479.37(256.03,980.48)	6.65(3.69,13.98)	-1.40(-1.49,-1.31)
Republic of Vanuatu	1.71(1.39,2.14)	1.65(1.33,2.03)	3.85(3.14,4.73)	1.56(1.27,1.88)	0.10(-0.01,0.21)	0.23(0.14,0.42)	0.28(0.17,0.57)	0.44(0.29,0.88)	0.22(0.14,0.52)	-0.89(-1.02,-0.76)	12.68(7.72,21.39)	9.35(5.88,16.81)	21.52(14.19,41.20)	7.80(5.12,15.18)	-0.80(-0.93,-0.66)
Independent State of Papua New Guinea	54.69(44.65,67.24)	1.92(1.56,2.36)	140.86(113.25,173.92)	1.78(1.43,2.16)	0.05(-0.06,0.16)	8.56(5.20,13.80)	0.30(0.18,0.58)	20.46(13.24,35.65)	0.27(0.17,0.55)	-0.39(-0.45,-0.34)	533.16(313.01,851.90)	12.35(7.61,19.88)	1243.25(832.13,2019.84)	11.31(7.43,19.45)	-0.29(-0.35,-0.22)
Czech Republic	349.76(285.70,424.75)	2.94(2.44,3.55)	374.89(302.68,459.06)	2.62(2.16,3.16)	-0.28(-0.50,-0.07)	50.79(42.56,59.93)	0.39(0.33,0.46)	88.46(75.73,101.06)	0.43(0.36,0.49)	0.56(0.29,0.82)	1445.02(1215.54,1725.14)	12.03(10.05,14.42)	1898.89(1608.40,2169.62)	11.11(9.35,12.86)	-0.05(-0.32,0.21)
Taiwan (Province of China)	453.90(367.73,558.98)	2.37(1.93,2.88)	749.04(598.59,928.75)	2.26(1.83,2.77)	-0.06(-0.10,-0.03)	12.60(11.90,13.30)	0.10(0.09,0.10)	76.80(65.75,84.87)	0.18(0.16,0.20)	5.40(3.93,6.89)	405.08(382.30,431.61)	2.40(2.28,2.55)	1514.76(1353.04,1648.99)	4.19(3.77,4.54)	4.76(3.43,6.12)
People's Republic of China	22027.91(17840.18,27321.46)	2.07(1.68,2.54)	41135.19(32838.91,51357.25)	2.24(1.81,2.75)	0.39(0.34,0.44)	4058.87(3098.64,5452.18)	0.61(0.46,0.83)	7317.95(4835.72,9075.75)	0.42(0.28,0.51)	-0.61(-1.00,-0.22)	149699.40(115904.35,202545.94)	16.18(12.63,21.60)	150940.71(99583.31,186503.40)	8.95(6.04,11.13)	-1.38(-1.74,-1.01)
Democratic People's Republic of Korea	385.68(310.71,477.55)	2.03(1.63,2.48)	601.81(478.99,752.27)	1.93(1.56,2.37)	-0.07(-0.13,-0.01)	43.28(29.39,78.31)	0.34(0.22,0.65)	95.21(66.92,160.09)	0.35(0.24,0.58)	0.34(0.14,0.53)	1491.84(1013.57,2585.81)	8.47(5.83,14.64)	2284.97(1613.35,3818.22)	8.04(5.73,13.40)	0.06(-0.12,0.24)
Republic of Indonesia	2130.91(1732.32,2636.83)	1.49(1.20,1.82)	4923.16(3970.54,6153.64)	1.73(1.41,2.12)	0.47(0.20,0.73)	185.04(106.08,426.34)	0.14(0.08,0.42)	267.71(170.28,672.39)	0.12(0.07,0.37)	-0.61(-0.71,-0.51)	10340.59(5841.17,24421.73)	6.00(3.43,13.39)	11946.70(7868.41,24908.03)	4.61(3.03,10.44)	-0.89(-1.00,-0.79)
Kingdom of Thailand	921.67(747.40,1144.69)	1.93(1.56,2.35)	1891.89(1513.44,2391.99)	2.08(1.68,2.55)	0.31(0.24,0.38)	39.79(25.36,123.06)	0.09(0.06,0.38)	62.39(34.54,281.83)	0.07(0.04,0.28)	-1.16(-1.35,-0.97)	2104.58(1431.38,4590.34)	4.14(2.75,10.59)	2148.57(1424.85,6094.36)	3.09(2.13,7.50)	-1.20(-1.42,-0.98)
Socialist Republic of Viet Nam	962.53(786.91,1190.92)	1.84(1.50,2.28)	1989.52(1591.34,2490.73)	1.87(1.51,2.30)	0.16(0.09,0.23)	69.85(38.39,193.89)	0.15(0.07,0.50)	105.57(52.95,331.83)	0.12(0.06,0.40)	-0.82(-0.87,-0.77)	3267.83(2110.49,6753.55)	5.39(3.27,12.30)	3746.81(2123.06,8856.42)	3.80(2.13,9.56)	-1.08(-1.11,-1.06)
Democratic Socialist Republic of Sri Lanka	347.33(285.10,427.35)	2.40(1.94,2.92)	645.83(513.80,798.34)	2.54(2.05,3.09)	0.29(0.19,0.38)	54.99(39.48,91.87)	0.42(0.32,0.70)	101.29(63.11,147.64)	0.42(0.27,0.60)	0.93(0.50,1.36)	2711.45(1852.63,4475.51)	17.23(12.16,28.77)	3523.42(2180.30,5135.34)	15.14(9.48,21.88)	0.37(-0.01,0.75)
Turkmenistan	60.99(49.93,75.69)	2.23(1.81,2.73)	103.17(84.35,128.23)	2.15(1.76,2.64)	0.01(-0.09,0.12)	4.18(3.22,5.27)	0.18(0.13,0.24)	9.49(7.09,12.41)	0.23(0.17,0.31)	0.34(0.06,0.62)	196.45(162.98,245.09)	6.31(5.00,7.84)	379.66(289.51,499.33)	7.85(5.96,10.27)	0.27(-0.05,0.59)
Republic of the Philippines	1047.03(859.46,1291.01)	2.31(1.87,2.82)	2238.48(1836.21,2775.80)	2.20(1.79,2.68)	-0.27(-0.48,-0.05)	51.50(33.54,115.24)	0.11(0.06,0.33)	69.90(47.94,183.52)	0.08(0.05,0.24)	-0.87(-1.09,-0.65)	3227.27(2172.92,5818.76)	4.93(3.35,10.27)	3530.66(2583.73,7427.35)	3.28(2.37,7.50)	-1.04(-1.25,-0.83)
Republic of Maldives	2.55(2.07,3.16)	1.74(1.40,2.15)	10.72(8.48,13.60)	2.06(1.67,2.55)	0.29(0.11,0.46)	0.85(0.56,1.17)	0.52(0.37,0.69)	0.75(0.57,1.14)	0.19(0.15,0.30)	-3.36(-3.46,-3.26)	55.09(33.20,78.85)	22.06(14.86,29.92)	33.70(26.57,49.80)	7.48(5.98,10.28)	-3.44(-3.50,-3.38)
Democratic Republic of Timor-Leste	8.98(7.32,11.39)	1.73(1.41,2.13)	19.71(15.94,24.13)	1.81(1.47,2.21)	0.19(0.11,0.26)	1.11(0.53,2.54)	0.19(0.09,0.49)	1.63(0.96,3.71)	0.15(0.08,0.43)	-0.60(-0.81,-0.39)	75.83(33.07,193.51)	8.01(4.14,17.11)	87.79(51.93,174.00)	6.29(3.77,13.06)	-0.75(-1.00,-0.50)
Kingdom of Tonga	1.66(1.36,2.02)	2.28(1.85,2.81)	1.93(1.58,2.36)	2.13(1.72,2.61)	0.08(-0.03,0.19)	0.12(0.08,0.23)	0.20(0.13,0.45)	0.12(0.08,0.28)	0.14(0.09,0.34)	-1.04(-1.11,-0.97)	5.13(3.72,9.32)	6.11(4.36,11.58)	4.37(2.88,9.01)	4.46(2.97,9.33)	-0.95(-1.02,-0.88)
Republic of Fiji	12.85(10.55,15.92)	2.23(1.82,2.73)	17.15(13.94,21.06)	1.94(1.58,2.37)	0.16(-0.07,0.39)	0.87(0.53,1.68)	0.21(0.13,0.44)	1.01(0.54,2.06)	0.15(0.08,0.32)	-1.24(-1.34,-1.14)	43.60(27.77,78.14)	7.00(4.49,13.49)	43.77(24.64,83.14)	5.17(2.93,9.99)	-1.06(-1.14,-0.99)
Republic of the Marshall Islands	0.51(0.42,0.64)	1.76(1.44,2.15)	0.79(0.64,0.97)	1.62(1.31,1.95)	0.05(-0.06,0.17)	0.07(0.04,0.13)	0.33(0.20,0.69)	0.08(0.05,0.17)	0.23(0.14,0.50)	-1.20(-1.28,-1.13)	3.36(2.10,5.84)	10.40(6.53,19.46)	3.94(2.27,7.49)	8.04(4.72,15.81)	-0.85(-0.98,-0.73)
Republic of Kiribati	0.98(0.81,1.22)	1.81(1.47,2.20)	1.65(1.33,2.06)	1.66(1.33,2.04)	0.04(-0.07,0.16)	0.13(0.07,0.26)	0.30(0.17,0.68)	0.18(0.10,0.36)	0.25(0.16,0.57)	-0.65(-0.70,-0.59)	6.57(3.60,13.37)	9.82(5.55,19.60)	8.31(4.89,16.07)	8.09(4.85,15.83)	-0.68(-0.74,-0.62)
Federated States of Micronesia	1.34(1.10,1.63)	1.84(1.50,2.22)	1.54(1.25,1.90)	1.68(1.37,2.03)	0.01(-0.10,0.11)	0.19(0.12,0.36)	0.36(0.22,0.80)	0.16(0.10,0.33)	0.24(0.15,0.55)	-1.33(-1.44,-1.23)	8.67(5.43,15.75)	10.85(6.76,19.90)	6.57(4.01,12.52)	7.48(4.69,15.03)	-1.20(-1.25,-1.14)
Kyrgyz Republic	87.90(73.02,106.38)	2.42(2.00,2.95)	163.55(133.53,201.01)	2.72(2.22,3.33)	0.32(0.15,0.49)	3.07(2.60,3.71)	0.09(0.08,0.11)	2.41(1.95,2.96)	0.05(0.04,0.06)	-2.25(-2.72,-1.78)	137.85(115.67,164.23)	3.48(2.92,4.17)	105.35(86.13,130.93)	1.76(1.46,2.16)	-2.64(-3.11,-2.18)
Mongolia	28.30(22.98,35.14)	1.80(1.47,2.22)	62.91(50.86,78.33)	2.09(1.69,2.55)	0.34(0.19,0.50)	20.14(11.23,32.16)	1.73(0.99,2.86)	34.25(19.88,43.98)	1.59(0.91,2.05)	-0.41(-0.57,-0.25)	801.24(407.13,1219.51)	50.71(26.29,79.60)	1230.35(721.47,1613.71)	43.92(25.60,56.54)	-0.52(-0.65,-0.38)
Independent State of Samoa	2.83(2.33,3.46)	2.38(1.93,2.92)	3.71(3.05,4.53)	2.11(1.71,2.56)	-0.05(-0.23,0.14)	0.26(0.17,0.50)	0.27(0.18,0.61)	0.30(0.20,0.64)	0.20(0.13,0.47)	-1.00(-1.06,-0.93)	11.96(8.14,20.44)	8.64(5.80,15.51)	12.36(8.35,23.27)	6.56(4.40,12.94)	-0.81(-0.87,-0.76)
Republic of Armenia	90.13(74.28,110.08)	2.87(2.36,3.49)	100.74(80.55,124.84)	2.77(2.27,3.40)	-0.08(-0.10,-0.07)	6.79(5.71,8.17)	0.25(0.21,0.31)	3.18(2.59,3.79)	0.08(0.06,0.09)	-4.83(-5.74,-3.91)	255.88(222.30,297.74)	8.12(7.03,9.55)	80.70(67.24,94.18)	2.18(1.82,2.53)	-5.26(-6.11,-4.41)
Republic of Moldova	142.03(117.32,173.54)	3.17(2.62,3.85)	138.83(112.19,171.58)	2.93(2.39,3.56)	0.14(-0.26,0.54)	0.08(0.07,0.09)	0.00(0.00,0.00)	0.32(0.28,0.38)	0.01(0.01,0.01)	4.88(2.63,7.17)	17.26(12.78,23.21)	0.39(0.29,0.52)	22.22(17.53,28.72)	0.54(0.44,0.68)	1.63(0.60,2.66)
Solomon Islands	4.06(3.29,4.98)	1.80(1.46,2.20)	8.78(7.16,10.88)	1.68(1.35,2.03)	0.09(-0.02,0.21)	0.40(0.24,0.67)	0.26(0.14,0.54)	0.76(0.49,1.45)	0.22(0.13,0.51)	-0.54(-0.61,-0.48)	20.90(12.81,31.79)	7.65(4.64,12.89)	33.63(22.54,58.79)	6.31(4.18,11.93)	-0.57(-0.65,-0.49)
Republic of Azerbaijan	138.06(112.90,171.82)	2.21(1.81,2.69)	298.88(242.30,370.23)	2.67(2.19,3.25)	0.73(0.50,0.96)	36.99(24.70,52.00)	0.70(0.48,0.99)	53.66(32.46,82.50)	0.57(0.36,0.85)	-1.02(-1.17,-0.88)	1503.25(949.18,2126.35)	22.60(14.60,31.48)	1871.05(1077.75,2999.05)	17.64(10.69,27.74)	-1.37(-1.54,-1.20)
Republic of Lithuania	137.61(113.28,167.80)	3.33(2.77,4.04)	115.84(94.01,141.92)	2.94(2.42,3.55)	-0.33(-0.57,-0.08)	1.42(1.22,1.64)	0.04(0.03,0.04)	4.50(3.83,5.18)	0.08(0.07,0.09)	3.90(2.01,5.82)	63.07(55.24,72.16)	1.71(1.51,1.95)	99.58(87.33,113.49)	2.30(2.04,2.58)	1.92(0.27,3.59)
Republic of Tajikistan	90.27(72.44,112.58)	2.35(1.91,2.88)	191.88(155.22,238.51)	2.27(1.84,2.77)	-0.08(-0.10,-0.05)	41.50(25.21,54.30)	1.21(0.74,1.66)	53.18(34.31,72.52)	0.81(0.53,1.09)	-1.65(-1.94,-1.35)	1915.90(1192.77,2736.03)	39.71(24.24,53.52)	2491.46(1593.07,3452.28)	27.43(17.75,37.43)	-1.54(-1.69,-1.39)
Republic of Kazakhstan	368.02(297.71,444.90)	2.51(2.04,3.04)	441.96(360.54,545.11)	2.33(1.90,2.83)	-0.31(-0.53,-0.09)	5.95(4.61,7.38)	0.05(0.03,0.06)	7.48(6.09,9.04)	0.05(0.04,0.06)	-0.23(-0.43,-0.02)	263.87(217.10,310.46)	1.74(1.42,2.06)	268.02(220.16,315.99)	1.49(1.23,1.74)	-0.97(-1.27,-0.67)
Georgia	157.41(126.83,192.44)	2.66(2.17,3.23)	118.37(96.01,145.37)	2.59(2.12,3.14)	-0.07(-0.09,-0.04)	21.13(16.29,26.81)	0.37(0.29,0.47)	58.04(45.46,72.63)	1.01(0.79,1.27)	4.74(3.87,5.62)	755.72(585.28,945.85)	13.22(10.31,16.55)	1317.70(1039.20,1665.07)	27.83(22.18,34.82)	3.48(2.52,4.46)
North Macedonia	52.08(42.37,63.67)	2.61(2.14,3.14)	63.35(50.96,78.29)	2.33(1.90,2.84)	-0.27(-0.36,-0.18)	2.65(1.75,4.24)	0.15(0.10,0.26)	3.43(1.76,6.20)	0.12(0.07,0.23)	-1.05(-1.26,-0.85)	89.39(64.47,133.27)	4.72(3.35,7.28)	89.81(46.67,153.39)	3.18(1.68,5.83)	-1.59(-1.85,-1.33)
Republic of Croatia	162.98(131.20,199.83)	2.94(2.43,3.56)	149.73(120.88,183.40)	2.60(2.13,3.13)	-0.24(-0.32,-0.17)	6.43(5.54,7.47)	0.12(0.10,0.14)	4.02(3.34,4.81)	0.05(0.04,0.05)	-2.05(-2.82,-1.27)	191.21(168.78,218.49)	3.46(3.07,3.92)	92.27(78.16,108.44)	1.31(1.11,1.53)	-2.22(-2.88,-1.55)
Republic of Uzbekistan	387.65(317.02,476.12)	2.48(2.03,3.03)	680.40(554.72,842.77)	2.10(1.72,2.55)	-0.08(-0.26,0.09)	68.39(54.36,84.57)	0.46(0.34,0.61)	96.84(77.07,119.02)	0.37(0.30,0.46)	-0.40(-0.65,-0.16)	3241.06(2715.77,3826.95)	17.14(14.13,20.56)	3874.23(3132.71,4698.68)	12.20(9.83,14.82)	-0.93(-1.17,-0.70)
Bosnia and Herzegovina	139.95(114.33,171.69)	3.09(2.54,3.74)	121.28(98.28,149.93)	2.80(2.31,3.41)	-0.32(-0.46,-0.17)	10.49(7.17,14.23)	0.27(0.19,0.37)	12.30(8.89,16.00)	0.21(0.15,0.27)	-1.01(-1.16,-0.87)	343.59(244.54,458.72)	7.89(5.70,10.57)	295.12(212.39,381.15)	5.91(4.25,7.68)	-1.22(-1.37,-1.07)
Republic of Bulgaria	255.21(208.30,311.93)	2.47(2.05,2.97)	181.00(146.16,222.21)	1.93(1.57,2.36)	-0.29(-0.48,-0.10)	15.60(13.16,18.35)	0.16(0.13,0.18)	11.42(8.47,14.98)	0.09(0.07,0.12)	-0.96(-1.61,-0.30)	485.24(412.14,564.95)	4.89(4.14,5.68)	285.98(216.79,375.62)	2.87(2.19,3.74)	-1.04(-1.64,-0.43)
Republic of Serbia	207.70(167.70,258.33)	1.97(1.60,2.41)	242.11(192.72,299.97)	2.09(1.70,2.55)	0.39(0.30,0.49)	12.81(8.03,32.03)	0.14(0.09,0.39)	14.80(8.97,30.18)	0.09(0.06,0.19)	-1.70(-1.86,-1.54)	368.82(261.84,789.03)	3.76(2.64,8.71)	337.04(214.51,618.06)	2.43(1.58,4.62)	-1.54(-1.65,-1.43)
Republic of Albania	84.59(68.40,104.57)	3.09(2.52,3.77)	90.51(73.14,111.48)	2.68(2.20,3.28)	-0.35(-0.45,-0.25)	11.43(7.57,14.84)	0.52(0.36,0.70)	11.03(7.11,19.33)	0.28(0.19,0.48)	-1.78(-2.02,-1.54)	458.24(290.79,580.72)	16.10(10.58,20.33)	286.53(173.00,512.06)	8.43(5.32,14.16)	-1.96(-2.14,-1.77)
Republic of Poland	949.28(777.15,1161.31)	2.32(1.91,2.80)	1091.37(890.40,1342.74)	2.19(1.80,2.65)	-0.05(-0.13,0.03)	69.01(59.60,79.15)	0.17(0.14,0.19)	77.24(69.35,84.06)	0.12(0.11,0.13)	-1.33(-1.73,-0.94)	2434.71(2143.46,2770.45)	6.04(5.34,6.87)	2111.87(1911.59,2297.01)	3.95(3.58,4.29)	-1.58(-1.93,-1.23)
Romania	561.60(455.89,686.24)	2.20(1.81,2.66)	480.97(388.96,592.33)	1.89(1.54,2.31)	-0.34(-0.42,-0.26)	119.66(96.20,144.12)	0.48(0.39,0.57)	170.10(145.82,194.90)	0.49(0.42,0.55)	-0.36(-0.68,-0.04)	3535.87(2924.51,4195.83)	14.19(11.85,16.68)	3948.61(3383.73,4490.62)	13.92(12.01,15.83)	-0.36(-0.67,-0.06)
Hungary	408.75(334.27,500.60)	3.32(2.77,4.00)	396.99(318.54,483.98)	3.02(2.48,3.65)	0.00(-0.15,0.15)	43.29(37.93,49.35)	0.32(0.28,0.37)	30.76(25.05,38.32)	0.16(0.13,0.21)	-1.45(-2.29,-0.61)	1268.42(1112.85,1450.53)	10.13(8.93,11.56)	725.02(590.13,907.97)	4.66(3.75,5.82)	-1.88(-2.69,-1.06)
Montenegro	16.00(13.10,19.46)	2.51(2.06,3.04)	18.27(14.67,22.52)	2.39(1.96,2.90)	0.01(-0.05,0.08)	0.26(0.12,1.36)	0.04(0.02,0.24)	0.29(0.13,1.71)	0.03(0.02,0.20)	-1.02(-1.26,-0.77)	9.61(5.38,40.61)	1.54(0.85,6.81)	8.45(4.88,38.19)	1.05(0.60,4.82)	-1.41(-1.61,-1.22)
Republic of Slovenia	65.48(53.71,79.95)	2.93(2.42,3.53)	73.83(60.35,91.37)	2.58(2.12,3.14)	-0.28(-0.34,-0.22)	0.90(0.80,1.02)	0.04(0.03,0.04)	1.78(1.49,2.07)	0.04(0.03,0.04)	-0.06(-0.33,0.21)	29.78(26.04,34.08)	1.29(1.13,1.48)	38.21(32.76,44.40)	1.03(0.88,1.21)	-0.81(-1.04,-0.59)
Kingdom of Denmark	206.02(165.92,254.81)	3.12(2.54,3.85)	349.72(282.19,438.23)	4.03(3.31,4.97)	0.90(0.78,1.02)	16.63(14.94,18.16)	0.23(0.21,0.25)	20.96(18.02,23.13)	0.18(0.15,0.19)	-0.90(-1.55,-0.24)	474.04(438.48,512.51)	8.64(7.98,9.36)	425.87(384.37,462.44)	4.80(4.39,5.20)	-1.83(-2.41,-1.24)
Slovak Republic	147.09(120.59,180.02)	2.61(2.16,3.17)	185.13(149.29,232.06)	2.63(2.15,3.23)	-0.01(-0.19,0.16)	5.97(3.75,12.32)	0.10(0.06,0.23)	5.61(3.48,11.40)	0.06(0.04,0.13)	-1.37(-1.65,-1.09)	190.04(129.40,325.97)	3.40(2.31,6.14)	154.00(99.90,267.81)	2.04(1.32,3.61)	-1.47(-1.72,-1.22)
Republic of Belarus	433.48(355.76,530.66)	3.67(3.04,4.46)	384.53(310.58,480.08)	3.10(2.53,3.78)	-0.29(-0.61,0.04)	4.68(3.58,5.79)	0.04(0.03,0.05)	5.76(4.74,6.89)	0.04(0.03,0.05)	-0.37(-0.56,-0.18)	221.81(185.49,282.13)	2.22(1.86,2.94)	185.48(153.81,219.53)	1.63(1.37,1.89)	-1.22(-1.39,-1.04)
Russian Federation	5368.12(4376.61,6595.93)	3.20(2.64,3.91)	5452.53(4431.73,6731.29)	2.90(2.38,3.51)	-0.04(-0.41,0.33)	514.58(465.14,599.95)	0.34(0.31,0.39)	220.72(204.07,238.34)	0.10(0.10,0.11)	-4.53(-4.98,-4.08)	18577.18(16746.94,21770.63)	12.67(11.52,14.59)	6389.11(5934.38,6897.28)	3.62(3.38,3.89)	-4.81(-5.28,-4.34)
Republic of Latvia	109.75(89.73,134.07)	3.49(2.87,4.24)	87.04(70.65,107.59)	3.18(2.62,3.86)	0.05(-0.32,0.43)	0.71(0.63,0.81)	0.02(0.02,0.03)	4.18(3.54,4.81)	0.10(0.09,0.12)	5.63(3.39,7.92)	32.89(28.46,38.74)	1.17(1.02,1.36)	89.06(76.70,101.80)	2.89(2.51,3.30)	3.32(1.43,5.24)
Republic of Estonia	65.64(53.91,80.90)	3.59(2.97,4.36)	56.58(45.26,70.27)	3.08(2.53,3.73)	-0.31(-0.59,-0.03)	0.39(0.34,0.44)	0.02(0.02,0.03)	1.12(0.92,1.31)	0.04(0.03,0.04)	2.78(0.95,4.63)	18.86(16.30,22.33)	1.17(1.02,1.36)	24.37(20.88,28.38)	1.12(0.96,1.29)	0.48(-0.93,1.91)
Ukraine	1922.21(1562.58,2366.90)	3.11(2.54,3.80)	1450.87(1164.47,1795.18)	2.52(2.06,3.07)	-0.49(-0.75,-0.23)	41.01(37.01,45.72)	0.07(0.06,0.07)	41.72(30.93,53.08)	0.07(0.05,0.09)	0.00(-0.33,0.34)	1697.16(1533.50,1901.38)	2.99(2.69,3.39)	1546.73(1172.39,1956.09)	3.05(2.37,3.83)	0.02(-0.31,0.35)
Japan	5141.07(4190.42,6321.66)	3.33(2.72,4.06)	6753.76(5460.24,8398.47)	3.09(2.54,3.79)	-0.17(-0.21,-0.14)	384.90(365.52,400.96)	0.29(0.28,0.30)	1002.43(785.83,1147.27)	0.29(0.25,0.32)	-0.26(-0.42,-0.11)	15633.91(15119.35,16189.56)	14.12(13.66,14.60)	18489.96(16064.33,20369.62)	10.72(10.03,11.46)	-1.31(-1.57,-1.05)
Republic of Korea	1152.32(954.26,1430.99)	3.02(2.49,3.68)	2233.77(1798.20,2797.21)	2.91(2.39,3.58)	-0.13(-0.21,-0.05)	42.27(28.83,71.62)	0.13(0.09,0.27)	39.43(22.00,136.24)	0.06(0.03,0.17)	-2.67(-2.73,-2.62)	2475.33(1691.91,3462.39)	6.52(4.49,9.50)	1245.74(841.77,2906.39)	2.40(1.67,4.75)	-3.11(-3.17,-3.05)
Kingdom of Spain	1295.97(1043.78,1588.79)	2.73(2.21,3.34)	1970.83(1573.23,2448.12)	2.82(2.27,3.46)	0.05(-0.03,0.13)	131.49(121.13,139.72)	0.27(0.25,0.29)	240.60(200.21,270.13)	0.22(0.19,0.24)	-0.76(-1.45,-0.07)	3742.61(3525.57,3948.69)	9.18(8.66,9.70)	4291.57(3844.77,4655.45)	6.00(5.52,6.41)	-1.56(-2.14,-0.98)
Brunei Darussalam	3.82(3.11,4.81)	2.08(1.69,2.54)	8.97(7.16,11.19)	2.02(1.62,2.49)	0.05(-0.01,0.10)	0.88(0.48,1.19)	0.48(0.29,0.65)	0.95(0.60,1.19)	0.27(0.20,0.34)	-1.48(-1.62,-1.35)	53.87(28.21,72.20)	20.62(11.28,27.62)	45.45(26.80,58.34)	11.44(7.20,14.88)	-1.59(-1.70,-1.48)
New Zealand	108.29(87.20,132.71)	2.92(2.36,3.56)	174.93(141.38,217.66)	2.62(2.11,3.21)	-0.28(-0.37,-0.20)	5.22(4.80,5.63)	0.14(0.13,0.15)	7.61(6.67,8.48)	0.10(0.09,0.11)	-1.27(-2.11,-0.41)	191.97(177.71,205.58)	5.33(4.94,5.71)	226.37(206.88,249.31)	3.55(3.26,3.89)	-1.58(-2.41,-0.74)
Dominican Republic	150.18(122.49,185.47)	2.86(2.31,3.52)	286.21(230.70,352.66)	2.66(2.14,3.25)	-0.33(-0.42,-0.24)	11.65(8.53,16.35)	0.17(0.13,0.32)	8.76(5.98,23.26)	0.08(0.06,0.23)	-2.72(-3.02,-2.42)	841.73(527.55,1156.35)	9.71(7.02,13.14)	456.34(329.64,831.99)	4.26(3.05,7.94)	-3.07(-3.33,-2.81)
Principality of Andorra	2.08(1.69,2.56)	3.45(2.82,4.22)	4.59(3.68,5.71)	3.66(2.98,4.47)	0.29(0.24,0.34)	0.12(0.08,0.17)	0.25(0.18,0.35)	0.17(0.11,0.27)	0.11(0.07,0.17)	-2.42(-2.63,-2.22)	4.38(3.09,6.03)	9.24(6.48,12.64)	4.14(2.80,5.90)	3.55(2.51,4.90)	-2.87(-3.01,-2.73)
Australia	561.47(458.25,695.07)	3.01(2.46,3.72)	991.88(794.10,1225.55)	2.87(2.33,3.49)	-0.11(-0.14,-0.08)	40.25(33.98,51.78)	0.22(0.19,0.29)	50.10(42.14,56.89)	0.12(0.10,0.13)	-2.20(-2.60,-1.81)	1322.27(1150.72,1671.80)	7.82(6.77,9.87)	1207.15(1087.40,1333.48)	3.69(3.36,4.03)	-2.48(-2.91,-2.05)
Republic of Singapore	71.63(57.96,89.67)	2.50(2.03,3.07)	170.75(136.87,212.29)	2.24(1.83,2.77)	-0.35(-0.41,-0.30)	5.69(5.34,6.05)	0.23(0.21,0.24)	5.99(5.28,6.63)	0.09(0.08,0.10)	-2.71(-3.19,-2.24)	311.15(289.09,335.15)	11.63(10.81,12.49)	207.22(187.16,227.83)	3.83(3.44,4.27)	-3.20(-3.59,-2.81)
Republic of Iceland	8.27(6.68,10.12)	3.08(2.49,3.78)	14.76(11.90,18.41)	3.20(2.61,3.93)	0.19(0.16,0.21)	0.44(0.40,0.48)	0.15(0.14,0.17)	0.75(0.62,0.87)	0.13(0.11,0.15)	-0.70(-1.47,0.07)	14.41(13.42,15.52)	5.55(5.16,5.99)	17.01(14.92,19.11)	3.79(3.36,4.27)	-1.45(-2.12,-0.77)
Kingdom of Belgium	511.94(412.18,632.41)	3.96(3.24,4.88)	719.50(584.74,900.01)	4.22(3.48,5.21)	0.26(0.15,0.37)	44.15(37.91,55.60)	0.31(0.27,0.39)	44.98(37.75,50.32)	0.18(0.16,0.20)	-1.67(-2.00,-1.34)	1111.79(990.55,1388.54)	9.49(8.41,11.94)	900.33(801.35,980.95)	5.18(4.74,5.60)	-1.94(-2.24,-1.64)
Republic of Cyprus	29.89(24.18,36.58)	3.61(2.92,4.42)	76.42(61.77,92.99)	4.24(3.49,5.13)	0.77(0.57,0.97)	13.04(6.73,17.27)	2.09(1.09,2.75)	14.55(7.31,18.60)	0.80(0.38,1.02)	-3.20(-3.33,-3.07)	376.93(205.10,487.56)	52.32(28.85,66.39)	304.62(165.54,379.34)	17.45(9.61,21.85)	-3.64(-3.78,-3.50)
Federal Republic of Germany	3020.79(2398.74,3717.09)	2.88(2.34,3.51)	4886.47(3953.61,6093.82)	3.59(2.93,4.36)	0.41(0.28,0.53)	304.23(253.63,350.38)	0.27(0.23,0.31)	543.72(452.64,604.01)	0.26(0.22,0.28)	0.52(-0.32,1.38)	8412.17(7108.21,9615.87)	9.48(8.04,10.81)	9440.98(8306.11,10352.48)	6.42(5.86,6.91)	-0.84(-1.56,-0.10)
Republic of Finland	197.20(157.83,244.27)	3.16(2.56,3.88)	332.31(268.06,415.42)	3.79(3.10,4.61)	0.84(0.60,1.07)	5.74(4.89,6.61)	0.09(0.08,0.10)	7.73(6.54,8.72)	0.06(0.05,0.07)	-0.94(-1.65,-0.23)	173.41(151.63,194.97)	3.12(2.74,3.50)	177.96(159.65,198.45)	2.13(1.95,2.35)	-1.03(-1.69,-0.37)
Republic of Austria	340.62(273.26,420.97)	3.42(2.76,4.19)	481.04(386.86,595.25)	3.57(2.91,4.41)	0.23(0.15,0.31)	19.95(18.31,21.46)	0.18(0.16,0.19)	24.91(21.77,27.61)	0.13(0.12,0.14)	-0.81(-1.53,-0.09)	508.58(474.79,544.86)	5.45(5.12,5.82)	494.91(449.81,541.70)	3.47(3.21,3.77)	-1.28(-1.95,-0.61)
Kingdom of the Netherlands	781.19(633.75,962.92)	4.37(3.56,5.36)	1192.49(950.66,1473.31)	4.66(3.79,5.76)	0.28(0.24,0.32)	30.23(27.83,32.66)	0.16(0.15,0.17)	47.80(41.31,53.33)	0.14(0.12,0.15)	-0.87(-1.78,0.06)	873.02(819.36,937.56)	5.38(5.07,5.74)	1004.24(915.13,1106.04)	3.91(3.61,4.26)	-1.37(-2.17,-0.56)
Portuguese Republic	263.50(209.64,327.97)	2.12(1.71,2.61)	364.75(292.90,453.34)	2.13(1.74,2.62)	-0.09(-0.15,-0.03)	28.14(26.25,30.11)	0.25(0.23,0.26)	56.06(47.71,63.05)	0.22(0.19,0.24)	-0.48(-1.16,0.19)	885.57(833.48,941.43)	8.98(8.47,9.56)	1021.59(916.59,1117.23)	5.82(5.35,6.28)	-1.65(-2.22,-1.08)
Commonwealth of the Bahamas	5.39(4.40,6.61)	2.59(2.10,3.13)	9.03(7.26,11.22)	2.14(1.73,2.62)	-0.52(-0.75,-0.30)	2.13(1.86,2.38)	1.06(0.93,1.18)	1.58(1.25,1.98)	0.40(0.32,0.50)	-4.03(-4.63,-3.43)	105.05(93.26,118.72)	44.29(39.24,49.69)	59.03(46.73,74.97)	14.75(11.70,18.62)	-4.43(-5.00,-3.86)
Grand Duchy of Luxembourg	14.00(11.28,17.14)	2.92(2.39,3.53)	30.16(24.50,37.20)	3.45(2.81,4.21)	0.54(0.33,0.75)	1.34(1.23,1.44)	0.27(0.25,0.29)	2.31(1.97,2.60)	0.21(0.18,0.23)	-1.05(-1.80,-0.29)	35.50(33.05,37.60)	8.29(7.72,8.79)	45.55(40.54,50.81)	5.06(4.54,5.64)	-1.93(-2.58,-1.27)
Republic of Italy	2891.71(2328.88,3574.10)	3.87(3.16,4.77)	3881.79(3154.34,4755.03)	3.95(3.22,4.82)	0.24(0.16,0.32)	170.60(159.13,179.02)	0.21(0.20,0.23)	137.91(115.44,152.51)	0.09(0.08,0.10)	-3.26(-3.79,-2.71)	4731.37(4492.96,4967.85)	7.16(6.83,7.49)	2779.45(2503.88,3032.67)	2.78(2.58,2.99)	-3.58(-4.07,-3.10)
Kingdom of Norway	219.90(177.65,269.20)	4.04(3.31,4.95)	303.16(246.53,375.46)	4.00(3.29,4.91)	0.03(-0.01,0.06)	7.28(6.82,7.64)	0.14(0.13,0.15)	4.77(4.24,5.20)	0.05(0.05,0.05)	-4.24(-5.61,-2.86)	286.81(273.55,300.52)	7.21(6.89,7.52)	132.81(121.41,148.29)	1.92(1.77,2.11)	-5.13(-6.27,-3.98)
Hellenic Republic	403.49(320.51,502.82)	3.07(2.47,3.80)	459.14(370.04,569.60)	2.88(2.36,3.53)	-0.22(-0.45,0.00)	31.94(29.27,34.24)	0.24(0.23,0.26)	87.19(75.86,97.73)	0.32(0.29,0.36)	0.81(0.36,1.27)	859.85(809.12,911.73)	7.86(7.37,8.31)	1495.12(1339.78,1644.78)	8.35(7.67,9.13)	0.09(-0.37,0.56)
State of Israel	216.95(177.49,263.24)	4.50(3.67,5.51)	464.21(377.68,563.75)	4.39(3.61,5.32)	-0.02(-0.08,0.03)	22.28(19.14,28.99)	0.48(0.41,0.61)	34.94(29.87,39.32)	0.27(0.23,0.30)	-1.78(-2.14,-1.42)	797.38(705.79,1033.71)	16.23(14.40,21.01)	795.58(718.73,869.32)	7.18(6.52,7.81)	-2.41(-2.77,-2.05)
French Republic	2329.42(1884.38,2879.07)	3.31(2.67,4.09)	4013.54(3243.84,4928.16)	4.07(3.34,4.98)	0.72(0.61,0.82)	239.05(190.93,295.83)	0.30(0.24,0.37)	325.05(279.45,361.07)	0.21(0.19,0.23)	-1.12(-1.40,-0.85)	5948.80(4979.18,7307.52)	9.04(7.70,11.20)	6113.49(5521.05,6689.37)	6.05(5.60,6.55)	-1.26(-1.53,-0.99)
Republic of El Salvador	95.85(78.71,116.75)	2.47(1.99,3.01)	226.84(185.61,281.37)	3.62(2.95,4.48)	1.33(1.18,1.48)	12.21(8.63,15.60)	0.29(0.20,0.38)	7.74(5.29,15.88)	0.12(0.08,0.24)	-3.52(-3.78,-3.26)	677.45(421.81,882.10)	11.91(7.96,15.04)	262.84(190.20,440.54)	4.18(3.02,6.98)	-3.90(-4.15,-3.66)
Ireland	61.50(50.04,76.00)	1.60(1.30,1.99)	123.54(99.13,154.20)	1.89(1.54,2.34)	0.68(0.63,0.73)	5.85(5.37,6.34)	0.15(0.14,0.16)	8.40(7.20,9.47)	0.11(0.10,0.12)	-1.14(-1.81,-0.47)	168.06(158.37,180.04)	4.59(4.34,4.90)	189.66(171.64,208.93)	3.02(2.74,3.33)	-1.45(-2.16,-0.73)
Republic of Malta	12.90(10.38,15.93)	3.13(2.52,3.86)	25.99(20.96,32.14)	3.74(3.06,4.59)	0.53(0.37,0.70)	0.36(0.33,0.39)	0.09(0.08,0.10)	0.77(0.66,0.87)	0.08(0.07,0.10)	-0.57(-1.32,0.19)	11.87(10.90,12.90)	3.19(2.93,3.48)	18.15(16.19,20.21)	2.90(2.55,3.27)	-0.51(-1.14,0.13)
United Kingdom of Great Britain and Northern Ireland	1568.59(1261.73,1949.65)	2.14(1.75,2.63)	2037.80(1632.82,2536.74)	2.13(1.73,2.62)	0.09(0.02,0.15)	106.32(95.89,132.25)	0.14(0.13,0.18)	118.93(106.70,125.68)	0.10(0.10,0.11)	-0.92(-1.01,-0.83)	3645.94(3233.60,4483.22)	6.44(5.57,7.93)	3037.04(2871.89,3181.12)	3.73(3.54,3.92)	-1.53(-1.65,-1.41)
Republic of Chile	379.47(311.08,466.42)	3.25(2.66,4.00)	758.02(610.68,930.79)	3.30(2.69,4.03)	-0.20(-0.30,-0.10)	24.30(22.75,25.78)	0.22(0.20,0.23)	33.65(30.42,36.58)	0.14(0.13,0.16)	-1.49(-1.93,-1.05)	1158.68(1084.28,1237.88)	9.04(8.49,9.64)	1111.86(1027.58,1201.12)	5.45(4.99,5.90)	-1.84(-2.23,-1.45)
Kingdom of Sweden	693.07(560.10,849.28)	6.05(4.97,7.42)	930.86(755.77,1152.74)	6.30(5.19,7.70)	0.06(0.04,0.08)	17.45(16.03,18.57)	0.14(0.13,0.15)	25.84(21.97,28.92)	0.12(0.11,0.14)	-0.65(-1.15,-0.16)	577.94(541.46,616.93)	6.08(5.70,6.46)	603.82(539.78,678.23)	4.14(3.73,4.63)	-1.33(-1.75,-0.90)
Swiss Confederation	590.59(476.68,727.91)	6.76(5.51,8.31)	932.70(761.48,1150.89)	7.09(5.80,8.66)	0.15(0.11,0.18)	35.18(29.64,42.71)	0.36(0.31,0.44)	37.40(30.50,42.49)	0.19(0.16,0.21)	-2.31(-2.72,-1.90)	926.74(810.96,1136.39)	12.09(10.29,14.95)	714.97(633.62,793.84)	5.12(4.64,5.63)	-3.00(-3.38,-2.63)
United States of America	5321.56(4318.36,6522.43)	1.84(1.50,2.25)	7689.56(6171.59,9562.46)	1.72(1.39,2.12)	-0.20(-0.29,-0.10)	971.21(855.47,1070.22)	0.32(0.28,0.35)	1785.10(1535.37,1944.86)	0.31(0.27,0.33)	-0.10(-0.22,0.01)	27123.39(24675.14,29590.10)	10.00(9.20,10.94)	36197.64(33003.84,38647.83)	8.08(7.49,8.60)	-0.81(-0.94,-0.68)
Barbados	6.98(5.64,8.41)	2.62(2.12,3.20)	9.97(8.02,12.30)	2.47(1.99,3.03)	-0.30(-0.40,-0.19)	2.96(2.54,3.36)	1.06(0.91,1.19)	1.63(1.31,2.01)	0.36(0.29,0.45)	-4.49(-5.07,-3.90)	97.47(84.09,109.81)	37.98(32.89,42.51)	43.13(34.29,53.97)	11.88(9.32,15.07)	-4.71(-5.26,-4.16)
Argentine Republic	813.46(655.75,998.99)	2.50(2.02,3.07)	1370.63(1107.84,1702.27)	2.65(2.14,3.29)	0.24(0.21,0.28)	137.26(120.10,152.75)	0.43(0.38,0.48)	108.46(99.98,117.73)	0.20(0.19,0.22)	-2.20(-2.37,-2.02)	6518.96(5775.23,7311.79)	19.89(17.60,22.29)	3409.00(3182.59,3695.20)	7.12(6.62,7.76)	-3.16(-3.32,-3.01)
Canada	661.64(533.26,810.15)	2.15(1.74,2.63)	934.87(749.08,1164.43)	1.77(1.43,2.17)	-0.64(-0.84,-0.43)	92.88(85.43,99.63)	0.31(0.29,0.33)	94.55(82.70,103.85)	0.14(0.13,0.15)	-4.03(-4.87,-3.17)	3066.02(2872.09,3264.31)	11.37(10.64,12.11)	2170.58(1981.56,2336.85)	4.63(4.23,4.99)	-4.24(-5.00,-3.48)
Belize	2.75(2.26,3.37)	2.12(1.71,2.62)	8.27(6.72,10.17)	2.18(1.76,2.65)	-0.10(-0.30,0.10)	0.78(0.71,0.87)	0.46(0.42,0.52)	0.50(0.44,0.56)	0.15(0.13,0.16)	-4.69(-5.35,-4.02)	51.05(45.23,58.07)	23.42(21.30,26.33)	22.31(19.51,25.15)	5.72(5.03,6.45)	-5.38(-5.94,-4.81)
Eastern Republic of Uruguay	87.91(71.53,108.17)	2.50(2.04,3.07)	98.56(79.51,121.81)	2.25(1.83,2.76)	-0.57(-0.68,-0.45)	7.77(6.80,8.58)	0.23(0.20,0.25)	7.93(7.08,8.69)	0.16(0.14,0.17)	-1.41(-1.52,-1.30)	305.38(273.37,337.12)	9.71(8.69,10.74)	218.20(200.03,238.37)	5.44(4.97,5.99)	-2.12(-2.23,-2.02)
Antigua and Barbuda	1.63(1.32,1.99)	2.93(2.39,3.58)	2.85(2.30,3.55)	2.74(2.24,3.39)	-0.32(-0.43,-0.21)	0.06(0.05,0.07)	0.11(0.10,0.12)	0.04(0.03,0.04)	0.04(0.04,0.04)	-4.25(-4.77,-3.74)	2.54(2.26,2.93)	4.42(3.93,5.05)	1.42(1.30,1.57)	1.50(1.37,1.64)	-4.36(-4.86,-3.85)
Grenada	1.70(1.39,2.05)	2.31(1.88,2.81)	2.33(1.87,2.88)	2.06(1.67,2.53)	-0.22(-0.30,-0.14)	0.65(0.55,0.79)	0.81(0.68,0.98)	0.27(0.23,0.31)	0.26(0.22,0.29)	-4.67(-5.34,-4.00)	28.14(24.15,33.00)	32.89(28.29,38.70)	9.28(8.01,10.66)	8.80(7.66,10.03)	-5.02(-5.54,-4.48)
Republic of Cuba	288.87(234.06,352.42)	2.68(2.17,3.27)	388.59(309.06,482.27)	2.55(2.06,3.14)	-0.26(-0.36,-0.16)	10.83(9.87,11.83)	0.11(0.10,0.12)	8.64(7.53,9.86)	0.05(0.04,0.06)	-3.53(-4.14,-2.92)	483.67(445.48,534.32)	4.69(4.31,5.19)	265.03(227.52,300.90)	1.90(1.64,2.14)	-3.88(-4.47,-3.30)
Commonwealth of Dominica	1.34(1.09,1.63)	2.12(1.70,2.59)	1.73(1.38,2.13)	2.23(1.80,2.72)	0.05(-0.10,0.21)	0.11(0.07,0.19)	0.18(0.11,0.32)	0.07(0.05,0.17)	0.09(0.07,0.23)	-2.72(-3.01,-2.43)	4.16(2.64,5.54)	6.07(3.90,8.16)	2.26(1.65,3.82)	3.46(2.49,5.66)	-2.40(-2.66,-2.14)
Republic of Guyana	11.89(9.76,14.88)	2.09(1.69,2.56)	14.30(11.60,17.58)	1.97(1.60,2.39)	-0.30(-0.41,-0.18)	1.17(1.04,1.32)	0.17(0.15,0.19)	2.67(2.05,3.46)	0.39(0.30,0.50)	0.29(-1.62,2.24)	78.67(68.49,91.81)	8.66(7.69,9.79)	119.10(90.63,157.23)	16.06(12.29,21.11)	-0.28(-2.09,1.56)
Republic of Haiti	88.41(72.42,109.52)	1.97(1.60,2.40)	189.13(151.80,236.79)	1.85(1.48,2.27)	-0.32(-0.44,-0.21)	55.05(21.15,95.23)	0.87(0.43,1.27)	53.33(26.63,86.85)	0.49(0.28,0.73)	-1.90(-2.00,-1.80)	3922.93(1303.42,7297.13)	45.54(17.74,78.68)	3454.06(1446.46,6073.08)	25.17(11.87,42.29)	-1.87(-2.00,-1.75)
Jamaica	52.17(42.25,62.92)	2.63(2.11,3.22)	79.31(64.21,98.16)	2.62(2.12,3.23)	-0.11(-0.19,-0.02)	4.37(3.81,4.92)	0.20(0.18,0.23)	2.11(1.65,2.72)	0.07(0.05,0.09)	-4.43(-4.94,-3.92)	230.25(199.63,265.43)	9.67(8.40,11.00)	78.11(60.29,100.39)	2.81(2.16,3.62)	-4.86(-5.31,-4.40)
Saint Vincent and the Grenadines	1.83(1.49,2.21)	2.11(1.71,2.55)	2.83(2.27,3.49)	2.15(1.74,2.66)	-0.10(-0.27,0.08)	0.08(0.07,0.09)	0.09(0.08,0.10)	0.08(0.07,0.09)	0.06(0.05,0.07)	-3.06(-4.12,-1.99)	4.61(4.02,5.36)	4.30(3.81,4.87)	2.81(2.44,3.27)	2.45(2.08,2.88)	-3.65(-4.67,-2.61)
Republic of Suriname	8.49(6.96,10.43)	2.68(2.18,3.29)	15.69(12.70,19.35)	2.51(2.05,3.10)	-0.31(-0.41,-0.21)	2.45(1.50,2.96)	0.74(0.49,0.90)	1.88(1.40,2.77)	0.32(0.24,0.47)	-3.15(-3.43,-2.87)	142.54(78.11,178.25)	36.76(21.37,45.17)	78.75(58.49,109.37)	14.26(10.62,19.62)	-3.62(-3.91,-3.33)
Plurinational State of Bolivia	118.59(96.27,145.58)	2.61(2.11,3.17)	265.92(215.20,329.44)	2.45(1.98,3.00)	-0.29(-0.40,-0.17)	23.12(12.19,37.11)	0.42(0.26,0.62)	21.16(14.84,30.39)	0.24(0.17,0.34)	-1.83(-1.87,-1.79)	1590.87(717.74,2702.39)	19.49(10.24,31.46)	979.69(707.60,1392.20)	9.02(6.57,12.82)	-2.52(-2.59,-2.45)
Republic of Ecuador	212.97(173.73,264.14)	2.92(2.34,3.58)	518.61(422.26,640.18)	2.97(2.41,3.63)	0.05(-0.06,0.16)	18.06(14.17,22.44)	0.27(0.20,0.34)	27.30(22.91,32.30)	0.18(0.15,0.21)	-0.96(-1.56,-0.37)	954.07(801.78,1233.61)	9.56(7.77,11.99)	957.09(811.86,1115.64)	5.80(4.94,6.74)	-1.21(-1.82,-0.60)
Republic of Peru	480.67(393.86,592.09)	3.00(2.42,3.70)	992.62(804.11,1223.54)	2.77(2.23,3.39)	-0.34(-0.44,-0.23)	42.35(29.15,57.23)	0.25(0.19,0.32)	42.84(30.81,62.50)	0.13(0.09,0.18)	-2.04(-2.22,-1.86)	2504.10(1458.25,3768.64)	10.57(6.89,14.85)	1606.97(1197.34,2183.81)	4.65(3.45,6.29)	-2.38(-2.54,-2.21)
Republic of Trinidad and Tobago	21.84(17.86,26.46)	2.12(1.71,2.57)	38.76(31.14,48.24)	2.27(1.83,2.79)	0.18(-0.01,0.36)	4.56(4.18,4.99)	0.47(0.44,0.52)	3.01(2.33,3.86)	0.18(0.14,0.24)	-4.12(-4.73,-3.50)	233.42(209.35,259.56)	20.94(18.88,23.27)	110.36(84.94,141.81)	7.72(5.91,9.91)	-4.29(-4.92,-3.66)
Republic of Colombia	731.09(600.29,886.62)	2.96(2.42,3.61)	1816.56(1473.80,2240.82)	3.38(2.76,4.15)	0.15(-0.03,0.33)	34.17(28.17,42.90)	0.15(0.12,0.19)	51.87(42.97,62.50)	0.10(0.08,0.12)	-1.73(-2.14,-1.31)	1787.01(1488.00,2249.97)	5.81(4.85,7.26)	1644.89(1380.16,1948.75)	3.29(2.74,3.93)	-1.89(-2.28,-1.49)
Republic of Costa Rica	68.77(55.96,85.15)	2.90(2.35,3.58)	189.26(152.90,233.07)	3.58(2.90,4.38)	0.45(0.29,0.62)	8.37(7.62,9.15)	0.43(0.39,0.48)	5.61(4.85,6.30)	0.10(0.09,0.12)	-5.69(-6.35,-5.02)	311.08(289.37,335.19)	12.40(11.51,13.34)	163.56(145.04,182.93)	3.31(2.92,3.70)	-5.12(-5.70,-4.53)
Republic of Guatemala	123.38(101.26,153.02)	2.30(1.86,2.82)	393.03(319.44,485.64)	2.94(2.37,3.61)	0.55(0.36,0.73)	13.67(12.15,16.42)	0.26(0.22,0.30)	6.66(5.66,7.77)	0.06(0.05,0.07)	-5.93(-6.57,-5.28)	863.25(757.38,1064.14)	9.37(8.31,11.15)	324.33(275.50,385.54)	2.36(2.02,2.80)	-5.45(-5.99,-4.91)
Saint Lucia	2.47(2.03,2.99)	2.28(1.85,2.79)	5.07(4.05,6.32)	2.33(1.88,2.87)	0.06(-0.22,0.35)	0.78(0.70,0.86)	0.80(0.72,0.89)	0.52(0.43,0.62)	0.24(0.20,0.29)	-5.16(-5.76,-4.56)	34.55(30.26,38.94)	28.45(25.20,31.93)	16.12(13.19,19.49)	8.36(6.78,10.22)	-5.07(-5.60,-4.53)
Republic of Honduras	73.12(59.88,90.31)	2.35(1.91,2.88)	245.83(201.41,303.82)	2.96(2.40,3.65)	0.49(0.30,0.68)	6.71(4.19,10.01)	0.26(0.14,0.41)	11.73(7.75,18.46)	0.20(0.12,0.32)	-0.99(-1.14,-0.85)	338.41(214.70,467.29)	8.15(5.15,11.98)	408.61(282.58,617.02)	5.30(3.67,8.02)	-1.52(-1.65,-1.40)
United Mexican States	1633.45(1345.36,2012.00)	2.61(2.12,3.18)	4287.35(3482.55,5273.35)	3.22(2.63,3.95)	0.27(0.02,0.52)	83.45(75.20,99.55)	0.15(0.13,0.17)	100.75(88.65,112.26)	0.09(0.08,0.10)	-1.94(-2.38,-1.49)	4819.12(4094.69,5870.85)	5.59(5.00,6.65)	3758.61(3349.29,4225.82)	3.11(2.78,3.53)	-2.14(-2.56,-1.72)
Republic of Nicaragua	58.59(48.11,73.17)	2.35(1.91,2.90)	175.05(142.37,214.32)	2.94(2.38,3.58)	0.19(-0.10,0.48)	4.13(2.24,6.51)	0.14(0.07,0.30)	2.31(1.42,8.77)	0.05(0.03,0.19)	-3.92(-4.21,-3.63)	278.67(143.07,397.21)	6.13(3.44,9.41)	102.47(68.95,301.79)	1.76(1.18,5.35)	-4.46(-4.70,-4.23)
Republic of Paraguay	74.49(60.71,90.97)	2.51(2.02,3.10)	160.68(130.29,196.44)	2.40(1.95,2.93)	-0.40(-0.66,-0.13)	2.41(1.62,6.51)	0.09(0.05,0.27)	4.25(2.58,12.43)	0.07(0.04,0.22)	-0.25(-0.38,-0.12)	122.35(87.00,253.74)	3.18(2.24,7.27)	156.73(102.90,384.23)	2.42(1.58,6.14)	-0.74(-0.88,-0.59)
Federative Republic of Brazil	2810.81(2296.11,3451.15)	2.34(1.90,2.87)	6077.92(4890.48,7486.91)	2.48(2.01,3.04)	0.13(-0.04,0.30)	391.71(370.85,410.40)	0.38(0.36,0.40)	775.14(709.73,818.47)	0.33(0.30,0.34)	-0.56(-1.12,-0.01)	18942.58(17688.92,20253.98)	14.51(13.64,15.35)	24078.22(22849.84,25249.19)	10.45(9.88,11.02)	-1.13(-1.68,-0.56)
Kingdom of Bahrain	7.26(5.86,9.25)	1.85(1.50,2.24)	28.25(22.52,35.84)	1.83(1.48,2.25)	-0.02(-0.17,0.14)	0.46(0.34,0.96)	0.19(0.14,0.51)	1.08(0.50,2.05)	0.16(0.07,0.31)	-0.04(-0.69,0.62)	28.81(20.95,56.25)	6.60(4.94,14.25)	48.22(24.24,82.98)	4.52(2.26,8.02)	-0.50(-1.22,0.21)
People's Democratic Republic of Algeria	307.70(251.03,379.57)	1.72(1.39,2.14)	782.08(631.38,978.98)	1.86(1.49,2.31)	0.25(0.12,0.39)	52.06(33.63,94.23)	0.31(0.19,0.67)	119.31(42.52,184.58)	0.40(0.13,0.61)	2.02(1.51,2.53)	3349.52(2116.14,5772.87)	12.33(8.00,22.02)	4334.96(2024.22,6496.23)	11.09(4.89,16.62)	0.49(0.14,0.84)
Republic of Iraq	210.82(173.25,260.95)	1.71(1.40,2.10)	640.34(524.62,798.22)	1.87(1.52,2.31)	0.17(-0.02,0.36)	37.44(20.83,57.26)	0.24(0.13,0.49)	37.56(19.83,79.91)	0.15(0.08,0.38)	-1.80(-1.87,-1.73)	2475.61(1290.59,3561.65)	11.13(6.20,16.49)	1821.98(992.54,3157.54)	5.20(2.84,10.09)	-2.47(-2.56,-2.37)
Turkey	857.86(704.46,1075.69)	1.86(1.50,2.32)	2423.45(1941.94,3032.63)	2.60(2.10,3.23)	1.23(0.81,1.65)	537.60(331.28,723.57)	1.20(0.79,1.65)	407.93(312.94,561.59)	0.50(0.39,0.69)	-2.53(-2.69,-2.38)	31948.71(16439.44,49529.92)	53.91(30.72,77.55)	12652.38(9855.73,15875.26)	16.56(12.93,20.56)	-3.52(-3.63,-3.41)
Islamic Republic of Iran	807.35(659.58,992.32)	2.07(1.69,2.54)	1903.63(1532.67,2361.21)	2.13(1.73,2.62)	0.17(-0.00,0.35)	470.57(306.84,592.56)	1.40(0.89,1.94)	428.63(285.60,493.98)	0.61(0.40,0.70)	-2.45(-2.55,-2.35)	28134.55(17154.64,38911.20)	50.93(32.60,63.56)	12800.80(9989.32,14671.86)	16.26(12.86,18.66)	-3.27(-3.43,-3.10)
Tunisia	141.53(116.45,174.30)	2.15(1.75,2.64)	306.39(246.00,379.70)	2.32(1.88,2.86)	0.32(0.18,0.46)	15.24(9.94,28.41)	0.25(0.16,0.54)	39.60(12.16,66.67)	0.36(0.11,0.60)	1.76(1.43,2.10)	901.16(574.29,1529.30)	10.56(6.84,18.90)	1063.53(438.06,1720.93)	9.23(3.88,14.80)	0.17(-0.14,0.47)
Republic of Panama	53.68(43.77,65.46)	2.81(2.28,3.44)	152.15(122.66,187.72)	3.47(2.80,4.27)	0.46(0.29,0.63)	3.16(2.68,3.53)	0.19(0.16,0.21)	2.57(2.04,3.08)	0.06(0.05,0.07)	-4.82(-5.52,-4.11)	132.40(114.20,149.71)	6.27(5.44,7.04)	88.67(73.65,104.21)	2.08(1.73,2.46)	-4.48(-5.10,-3.86)
Bolivarian Republic of Venezuela	424.32(344.05,518.06)	3.04(2.45,3.69)	935.42(757.50,1155.74)	3.20(2.60,3.95)	0.19(-0.10,0.47)	13.93(12.07,15.75)	0.11(0.09,0.12)	12.03(9.21,15.33)	0.04(0.03,0.06)	-4.16(-4.76,-3.57)	758.81(656.84,866.12)	4.25(3.69,4.81)	491.58(391.39,609.33)	1.83(1.46,2.27)	-3.71(-4.24,-3.17)
Hashemite Kingdom of Jordan	53.42(43.48,66.45)	2.21(1.79,2.71)	242.77(197.06,299.34)	2.25(1.82,2.78)	-0.11(-0.25,0.04)	1.64(0.85,6.70)	0.06(0.03,0.29)	4.35(1.91,14.18)	0.06(0.02,0.20)	0.88(0.39,1.37)	122.17(66.97,443.72)	2.77(1.49,10.88)	253.26(124.39,686.32)	2.45(1.20,6.89)	0.57(0.07,1.07)
Lebanon	52.78(42.99,64.94)	2.05(1.67,2.53)	122.98(99.21,153.01)	2.08(1.68,2.58)	0.12(-0.03,0.27)	20.61(12.77,31.21)	0.89(0.55,1.34)	23.43(17.49,38.10)	0.37(0.28,0.59)	-3.06(-3.19,-2.93)	947.73(528.68,1451.28)	31.97(18.96,48.19)	617.44(485.42,814.01)	11.26(8.86,14.49)	-3.55(-3.64,-3.45)
Arab Republic of Egypt	1119.64(915.23,1402.22)	2.71(2.22,3.33)	1547.37(1262.19,1927.18)	1.74(1.41,2.14)	-1.76(-2.04,-1.49)	727.23(364.67,1033.20)	1.17(0.77,1.55)	282.17(220.48,376.81)	0.36(0.28,0.50)	-3.60(-3.78,-3.42)	58614.86(23940.43,86262.18)	74.21(37.61,105.38)	17675.58(13635.22,23380.86)	16.51(12.82,21.87)	-4.71(-4.88,-4.55)
State of Kuwait	27.17(21.61,34.41)	2.06(1.66,2.54)	105.94(82.68,135.19)	2.17(1.75,2.64)	0.25(0.11,0.39)	0.92(0.82,1.02)	0.07(0.07,0.08)	3.95(3.36,4.65)	0.14(0.12,0.16)	3.62(1.94,5.32)	68.46(60.79,77.52)	4.17(3.73,4.70)	206.86(174.05,243.43)	6.51(5.41,7.73)	3.11(1.45,4.81)
Palestine	28.23(22.93,34.24)	2.16(1.76,2.66)	75.48(61.28,92.91)	1.87(1.52,2.28)	0.19(-0.13,0.50)	4.17(1.94,7.81)	0.23(0.10,0.59)	3.85(1.54,10.54)	0.13(0.05,0.41)	-1.73(-1.83,-1.63)	293.36(130.86,482.37)	10.15(4.91,19.39)	212.16(91.01,499.79)	4.66(1.98,11.88)	-2.10(-2.30,-1.89)
Libya	63.94(52.24,78.82)	2.21(1.78,2.71)	144.08(115.28,180.97)	2.11(1.70,2.58)	-0.24(-0.46,-0.03)	14.52(8.53,27.37)	0.32(0.20,0.64)	17.83(8.05,31.21)	0.37(0.17,0.64)	1.61(1.22,1.99)	1145.65(646.74,2165.29)	20.28(11.95,37.85)	1003.58(437.20,1781.92)	20.43(8.75,36.65)	1.16(0.75,1.57)
Morocco	344.06(281.75,426.14)	1.78(1.45,2.17)	677.59(545.76,846.27)	1.81(1.46,2.22)	0.15(-0.02,0.31)	71.78(40.40,126.39)	0.33(0.18,0.67)	131.02(50.26,201.15)	0.43(0.15,0.67)	1.61(1.28,1.95)	4665.24(2537.13,7926.86)	15.60(8.74,26.69)	4558.95(2226.46,6953.34)	13.46(6.51,20.47)	0.19(-0.20,0.57)
United Arab Emirates	24.49(19.37,31.52)	1.76(1.44,2.17)	175.24(133.86,229.61)	1.67(1.36,2.04)	0.04(-0.17,0.25)	6.50(3.44,9.60)	0.73(0.38,1.09)	9.66(5.42,12.45)	0.38(0.20,0.53)	0.25(-0.60,1.11)	418.41(231.76,631.75)	26.79(14.50,38.89)	433.66(265.84,540.84)	10.31(5.63,13.04)	-1.56(-2.03,-1.09)
Saudi Arabia	178.90(144.19,224.16)	1.62(1.32,1.99)	672.66(535.27,842.31)	1.91(1.55,2.32)	0.78(0.60,0.96)	14.46(8.89,30.59)	0.14(0.08,0.39)	18.01(9.19,35.62)	0.08(0.04,0.20)	-1.32(-1.83,-0.81)	952.37(572.90,1680.67)	5.65(3.56,11.82)	871.78(464.94,1517.88)	2.62(1.45,5.39)	-2.03(-2.56,-1.50)
Qatar	6.64(5.20,8.51)	1.86(1.49,2.28)	54.26(42.44,69.78)	1.89(1.54,2.30)	0.04(-0.12,0.20)	0.28(0.19,0.57)	0.17(0.11,0.38)	1.29(0.65,2.07)	0.13(0.07,0.19)	-0.06(-0.56,0.45)	18.62(12.71,36.59)	5.34(3.73,10.72)	68.65(37.26,102.12)	3.75(1.96,5.57)	-0.15(-0.78,0.48)
Bhutan	7.85(6.38,9.70)	1.90(1.55,2.32)	11.94(9.76,14.79)	1.64(1.33,2.02)	-0.54(-0.60,-0.48)	1.46(0.80,2.28)	0.39(0.17,0.67)	1.81(0.91,2.96)	0.31(0.15,0.52)	-0.89(-0.94,-0.84)	91.90(45.04,137.40)	14.29(7.77,22.41)	61.13(33.90,96.76)	9.27(5.13,14.22)	-1.64(-1.80,-1.49)
Bangladesh	918.15(749.54,1147.25)	1.28(1.02,1.59)	2842.40(2308.79,3540.67)	1.81(1.46,2.23)	1.24(1.08,1.40)	262.84(124.38,437.15)	0.43(0.16,0.89)	382.58(189.27,663.54)	0.30(0.14,0.57)	-0.99(-1.23,-0.76)	13289.01(7185.37,19200.45)	13.28(6.39,21.85)	12634.18(7166.87,19513.79)	8.66(4.81,13.69)	-1.21(-1.35,-1.06)
Oman	27.19(21.92,34.19)	1.99(1.63,2.43)	83.30(67.15,107.54)	2.02(1.64,2.47)	0.21(0.03,0.40)	1.33(0.68,3.84)	0.11(0.05,0.39)	2.64(0.95,5.07)	0.11(0.04,0.24)	1.51(0.37,2.66)	86.54(46.14,226.40)	4.18(2.22,12.07)	133.70(51.07,241.29)	3.90(1.49,7.22)	1.16(0.01,2.31)
Afghanistan	109.79(89.64,134.03)	1.43(1.16,1.76)	277.76(224.62,343.77)	1.46(1.18,1.78)	0.16(-0.01,0.34)	38.02(19.47,60.69)	0.41(0.21,0.73)	125.41(56.31,188.57)	0.67(0.24,1.10)	2.38(1.95,2.82)	2360.20(1185.74,3637.12)	18.19(9.20,29.19)	8110.07(3767.65,12130.89)	25.28(10.98,39.03)	1.96(1.53,2.39)
Syrian Arab Republic	156.48(126.92,194.01)	1.87(1.52,2.31)	279.91(227.04,345.64)	1.96(1.60,2.41)	0.34(-0.17,0.85)	10.19(5.38,38.09)	0.09(0.05,0.43)	6.17(2.73,33.04)	0.06(0.03,0.29)	-1.92(-2.26,-1.59)	731.51(373.18,2389.95)	4.54(2.50,16.61)	283.90(132.91,1389.63)	2.32(1.05,11.57)	-2.23(-2.73,-1.72)
Nepal	204.33(166.00,254.31)	1.49(1.20,1.84)	445.16(362.01,545.37)	1.59(1.29,1.94)	0.21(0.17,0.26)	54.44(31.04,84.73)	0.38(0.17,0.67)	67.87(34.14,116.67)	0.31(0.15,0.58)	-0.65(-0.79,-0.50)	3424.03(1746.07,5124.95)	14.75(8.37,23.03)	2556.76(1464.97,3967.16)	9.42(5.15,15.02)	-1.40(-1.42,-1.37)
Yemen	202.70(166.70,249.07)	2.50(2.03,3.03)	505.48(413.17,634.06)	2.15(1.73,2.64)	-0.65(-0.88,-0.43)	43.79(21.44,72.64)	0.40(0.16,0.81)	106.18(49.25,160.25)	0.55(0.21,0.90)	1.61(1.24,1.97)	3171.40(1562.85,5312.94)	16.75(8.15,27.97)	5974.80(2916.76,8720.97)	19.30(9.07,28.92)	1.04(0.66,1.42)
Congo	40.78(33.06,50.21)	2.57(2.09,3.12)	87.63(71.23,108.07)	2.13(1.72,2.62)	-0.42(-0.64,-0.20)	3.16(2.12,6.58)	0.22(0.13,0.45)	4.45(2.62,8.34)	0.15(0.08,0.29)	-1.40(-1.48,-1.32)	173.01(113.99,371.86)	7.91(5.31,16.16)	205.55(130.67,368.56)	4.80(2.93,8.78)	-1.72(-1.85,-1.59)
India	10591.96(8714.54,13169.41)	1.62(1.32,1.98)	23741.72(19176.40,29559.14)	1.74(1.41,2.12)	0.20(0.19,0.22)	1755.74(1131.93,2495.49)	0.29(0.17,0.46)	2611.57(1738.58,4059.81)	0.24(0.15,0.39)	-0.44(-0.58,-0.30)	99575.41(57533.96,134279.23)	11.73(7.49,16.30)	94736.65(69016.87,131902.05)	7.75(5.52,11.36)	-1.16(-1.24,-1.07)
Pakistan	1174.30(958.10,1432.94)	1.51(1.22,1.83)	2519.72(2035.52,3133.01)	1.38(1.11,1.70)	0.13(-0.02,0.29)	310.77(190.35,457.71)	0.34(0.18,0.55)	484.97(311.47,747.24)	0.32(0.18,0.56)	-0.21(-0.36,-0.05)	19706.09(10808.83,28216.34)	14.41(8.92,20.63)	26574.00(16921.27,38115.28)	11.96(7.86,18.26)	-0.30(-0.41,-0.18)
Angola	121.44(96.86,150.11)	1.86(1.48,2.25)	330.89(268.91,408.28)	1.61(1.31,1.97)	-0.39(-0.54,-0.24)	17.85(10.63,39.07)	0.27(0.13,0.56)	30.49(16.39,57.06)	0.19(0.09,0.36)	-1.13(-1.20,-1.07)	1120.01(596.51,2654.87)	10.14(6.07,21.29)	1628.07(975.69,2923.79)	6.21(3.27,11.56)	-1.55(-1.67,-1.44)
Central African Republic	32.66(26.31,40.07)	1.85(1.49,2.26)	61.02(48.59,75.82)	1.67(1.35,2.03)	-0.35(-0.42,-0.29)	5.41(3.13,10.66)	0.30(0.14,0.65)	7.73(3.82,13.81)	0.25(0.10,0.45)	-0.62(-0.66,-0.59)	324.09(176.77,698.29)	11.36(6.34,21.84)	429.11(231.83,780.06)	8.92(4.34,15.95)	-0.73(-0.78,-0.69)
Democratic Republic of the Congo	751.25(615.58,933.75)	3.13(2.53,3.85)	1165.86(943.85,1452.19)	1.93(1.55,2.33)	-1.35(-1.57,-1.13)	58.22(35.53,104.75)	0.23(0.10,0.46)	86.26(36.21,160.62)	0.19(0.07,0.39)	-0.45(-0.54,-0.36)	3648.20(2259.97,6621.24)	8.75(5.31,15.90)	4157.99(2013.45,7024.16)	6.13(2.66,11.34)	-0.99(-1.10,-0.88)
Comoros	6.03(4.85,7.43)	2.00(1.59,2.42)	10.83(8.71,13.29)	1.70(1.37,2.09)	-0.75(-0.98,-0.51)	0.96(0.56,1.66)	0.27(0.12,0.50)	0.84(0.41,1.65)	0.15(0.07,0.30)	-2.09(-2.36,-1.81)	62.24(35.32,107.91)	11.73(6.64,19.72)	41.28(22.71,80.71)	5.92(3.15,11.42)	-2.48(-2.79,-2.17)
Equatorial Guinea	5.15(4.20,6.29)	1.86(1.50,2.25)	18.23(14.67,22.99)	1.86(1.49,2.30)	-0.06(-0.25,0.12)	0.73(0.43,1.41)	0.26(0.12,0.55)	0.81(0.44,1.44)	0.11(0.06,0.20)	-3.04(-3.27,-2.82)	41.30(22.49,82.50)	9.48(5.49,17.84)	43.17(24.27,74.66)	3.83(2.13,6.65)	-3.34(-3.55,-3.14)
Gabon	20.69(17.00,25.11)	2.84(2.30,3.43)	29.75(23.93,36.78)	2.05(1.66,2.51)	-0.76(-0.94,-0.59)	1.38(0.77,2.61)	0.21(0.10,0.45)	1.45(0.77,2.58)	0.13(0.07,0.24)	-1.48(-1.55,-1.40)	60.67(38.83,107.61)	6.99(4.07,13.04)	60.12(34.00,104.16)	4.14(2.32,7.11)	-1.56(-1.69,-1.43)
Ethiopia	786.66(647.74,971.71)	2.48(2.02,3.01)	1856.64(1521.26,2307.14)	2.53(2.06,3.09)	-0.41(-0.60,-0.23)	91.65(48.32,174.26)	0.27(0.10,0.54)	97.35(38.22,203.37)	0.15(0.05,0.30)	-2.29(-2.41,-2.16)	5662.98(3177.02,11303.82)	10.79(5.32,20.84)	5398.47(2500.38,11568.87)	5.53(2.30,11.22)	-2.53(-2.67,-2.40)
Burundi	88.78(71.92,110.12)	2.52(2.01,3.07)	145.65(116.49,182.30)	1.70(1.36,2.08)	-1.52(-1.71,-1.32)	15.53(8.77,31.16)	0.37(0.15,0.83)	15.92(6.39,31.86)	0.21(0.07,0.44)	-2.01(-2.13,-1.89)	981.11(591.81,1970.88)	15.60(8.34,32.70)	916.19(413.87,1813.47)	7.64(3.08,15.11)	-2.38(-2.47,-2.29)
Eritrea	45.24(36.84,55.97)	2.19(1.81,2.64)	82.84(66.50,103.99)	1.77(1.42,2.15)	-0.83(-0.96,-0.69)	7.08(3.95,14.44)	0.30(0.14,0.66)	8.50(3.97,16.23)	0.21(0.09,0.43)	-1.12(-1.24,-0.99)	459.71(255.63,966.77)	13.09(7.07,27.04)	469.80(239.30,930.61)	8.01(3.80,15.23)	-1.62(-1.75,-1.50)
Mauritius	31.54(25.65,39.48)	3.27(2.67,4.03)	51.58(41.59,63.54)	3.24(2.65,3.96)	0.11(-0.02,0.24)	2.28(2.10,2.47)	0.26(0.24,0.28)	11.01(9.78,11.99)	0.71(0.63,0.77)	4.73(4.02,5.46)	109.85(101.74,119.25)	10.91(10.11,11.82)	398.21(351.08,433.75)	28.96(25.61,31.57)	5.50(4.56,6.45)
Djibouti	4.87(3.97,6.08)	1.83(1.46,2.24)	19.42(15.72,23.93)	1.92(1.57,2.35)	-0.08(-0.30,0.14)	0.60(0.32,1.16)	0.23(0.11,0.49)	1.20(0.54,2.33)	0.15(0.07,0.29)	-1.41(-1.50,-1.31)	38.97(19.53,78.39)	9.30(5.13,18.30)	62.60(30.49,119.10)	5.68(2.66,10.81)	-1.77(-1.95,-1.59)
Kenya	349.53(286.26,432.29)	2.49(2.02,3.02)	926.71(761.54,1138.65)	2.59(2.10,3.15)	-0.13(-0.30,0.03)	19.33(10.23,40.06)	0.14(0.05,0.32)	32.91(14.34,65.25)	0.12(0.05,0.23)	-0.37(-0.48,-0.26)	1163.95(747.73,2247.58)	5.22(2.64,10.69)	1654.78(819.90,3203.83)	4.05(1.93,7.82)	-0.57(-0.70,-0.44)
Malawi	130.96(104.88,160.40)	2.14(1.71,2.61)	202.87(163.13,252.97)	1.60(1.29,1.95)	-1.38(-1.55,-1.20)	17.05(10.39,31.65)	0.22(0.10,0.43)	18.71(9.07,33.13)	0.16(0.07,0.30)	-1.06(-1.21,-0.91)	1164.53(640.30,2318.88)	9.49(5.69,17.02)	1045.55(545.99,1827.17)	6.17(3.08,10.65)	-1.47(-1.63,-1.31)
Rwanda	120.41(97.11,148.63)	2.68(2.15,3.27)	165.05(133.33,206.34)	1.69(1.36,2.11)	-1.69(-1.95,-1.44)	18.05(10.50,38.60)	0.35(0.17,0.75)	13.93(6.15,29.60)	0.17(0.07,0.37)	-3.05(-3.31,-2.78)	1150.13(686.04,2621.66)	14.89(8.47,30.80)	725.39(355.63,1528.51)	6.17(2.87,13.12)	-3.62(-3.91,-3.34)
Somalia	96.37(76.79,119.97)	2.07(1.65,2.52)	215.23(171.36,270.66)	1.73(1.39,2.12)	-0.69(-0.83,-0.55)	19.67(8.50,36.69)	0.36(0.11,0.75)	34.20(9.37,73.40)	0.27(0.06,0.58)	-0.91(-1.02,-0.80)	1328.36(604.36,2411.90)	15.22(5.96,29.72)	2163.18(667.22,4512.51)	10.58(2.79,22.97)	-1.09(-1.22,-0.96)
United Republic of Tanzania	386.57(317.65,471.04)	2.33(1.90,2.86)	715.34(575.53,881.81)	1.79(1.44,2.17)	-0.75(-1.20,-0.30)	46.97(27.52,88.89)	0.26(0.11,0.52)	61.98(31.43,113.13)	0.16(0.07,0.31)	-1.62(-1.68,-1.57)	2891.86(1921.46,5623.60)	10.23(5.60,18.80)	3514.28(2011.80,6433.38)	6.27(3.28,11.36)	-1.57(-1.65,-1.48)
Seychelles	1.15(0.94,1.39)	1.80(1.45,2.19)	2.17(1.75,2.67)	1.85(1.50,2.25)	0.18(0.09,0.28)	0.07(0.05,0.21)	0.12(0.07,0.36)	0.08(0.04,0.24)	0.08(0.04,0.25)	-0.93(-1.05,-0.81)	2.89(1.94,6.12)	4.26(2.88,9.42)	3.10(1.90,6.74)	2.86(1.75,6.44)	-0.83(-0.94,-0.72)
Burkina Faso	130.78(106.67,160.55)	2.15(1.73,2.64)	303.37(249.64,371.05)	2.10(1.71,2.57)	0.11(-0.14,0.37)	20.07(9.23,38.23)	0.32(0.09,0.67)	35.96(17.27,59.45)	0.27(0.09,0.52)	-0.32(-0.42,-0.22)	1141.72(636.95,1962.50)	11.14(4.83,21.45)	1991.59(1161.79,3180.60)	8.98(4.20,14.92)	-0.44(-0.55,-0.34)
Madagascar	176.80(144.83,220.18)	2.29(1.88,2.82)	380.30(304.10,479.37)	1.96(1.58,2.39)	-0.94(-1.13,-0.74)	37.89(22.98,75.03)	0.42(0.20,0.80)	58.23(30.96,112.10)	0.31(0.15,0.61)	-0.87(-0.92,-0.82)	2391.31(1395.44,5242.16)	18.04(10.75,35.43)	3453.94(1961.40,6744.70)	12.80(6.85,24.47)	-1.00(-1.07,-0.94)
Mozambique	177.78(145.25,219.45)	2.03(1.63,2.48)	331.36(268.25,411.57)	1.73(1.40,2.13)	-0.70(-0.82,-0.58)	25.81(14.22,47.17)	0.27(0.11,0.60)	40.25(18.01,70.27)	0.24(0.09,0.46)	-0.04(-0.21,0.14)	1573.13(836.95,2789.01)	10.78(5.94,20.22)	2156.89(1087.08,3608.29)	8.59(3.81,15.15)	-0.35(-0.52,-0.19)
Namibia	26.30(21.41,32.49)	2.75(2.21,3.37)	51.01(42.08,61.85)	2.67(2.18,3.22)	-0.28(-0.38,-0.18)	1.36(0.97,1.99)	0.16(0.11,0.23)	2.18(1.50,3.03)	0.13(0.09,0.19)	-0.66(-0.78,-0.54)	66.20(46.77,97.82)	5.88(4.21,8.48)	99.18(67.19,140.65)	4.86(3.36,6.76)	-0.62(-0.73,-0.52)
Botswana	19.62(15.98,24.13)	2.26(1.83,2.72)	39.16(31.75,48.58)	1.95(1.57,2.40)	-0.43(-0.49,-0.38)	1.37(0.89,2.23)	0.18(0.11,0.28)	1.79(1.23,2.43)	0.10(0.07,0.14)	-1.71(-1.81,-1.61)	68.72(46.28,112.76)	6.58(4.32,10.65)	85.68(59.61,114.39)	4.04(2.86,5.30)	-1.51(-1.62,-1.40)
Cabo Verde	5.55(4.57,6.75)	2.17(1.77,2.67)	13.69(11.06,16.91)	2.61(2.11,3.17)	0.90(0.76,1.05)	0.64(0.23,1.40)	0.21(0.06,0.48)	0.59(0.22,1.10)	0.13(0.05,0.24)	-1.82(-1.97,-1.67)	33.49(16.00,64.23)	8.63(3.53,18.25)	22.38(8.83,41.02)	4.41(1.75,8.30)	-2.43(-2.55,-2.31)
Zimbabwe	117.56(96.22,144.61)	1.79(1.45,2.18)	199.92(162.05,250.11)	1.85(1.50,2.29)	-0.42(-0.68,-0.17)	8.26(4.13,14.06)	0.15(0.08,0.25)	18.38(11.85,26.91)	0.18(0.12,0.26)	0.94(0.60,1.29)	401.51(206.83,677.90)	5.22(2.65,8.94)	955.43(595.20,1431.59)	7.16(4.65,10.44)	1.45(1.03,1.87)
Zambia	105.46(85.70,130.28)	2.19(1.77,2.69)	202.81(165.31,251.99)	1.60(1.29,1.96)	-1.24(-1.43,-1.05)	12.22(7.30,25.48)	0.24(0.12,0.49)	25.73(9.48,51.66)	0.24(0.08,0.49)	0.42(0.21,0.63)	771.32(449.83,1776.95)	9.20(5.51,18.24)	1342.55(566.65,2580.89)	8.64(3.22,17.19)	0.09(-0.10,0.27)
Uganda	320.60(256.35,399.67)	3.04(2.43,3.75)	529.60(432.42,654.19)	2.00(1.60,2.41)	-1.34(-1.91,-0.77)	37.41(20.15,67.59)	0.28(0.10,0.61)	40.67(22.16,72.11)	0.15(0.07,0.28)	-2.36(-2.49,-2.24)	2517.99(1508.95,4482.50)	11.72(5.79,22.80)	2530.95(1529.46,4433.19)	5.98(3.20,10.36)	-2.51(-2.67,-2.36)
Lesotho	18.47(15.19,22.40)	1.69(1.37,2.07)	24.74(20.33,30.43)	1.70(1.38,2.07)	0.02(-0.00,0.05)	1.43(0.88,2.36)	0.14(0.09,0.24)	1.90(1.28,2.56)	0.14(0.10,0.20)	0.49(0.21,0.78)	62.34(38.77,105.17)	4.93(3.06,8.21)	87.02(58.84,115.73)	5.40(3.74,7.19)	0.80(0.48,1.12)
Eswatini	8.39(6.79,10.31)	1.72(1.39,2.10)	14.69(11.77,18.00)	1.74(1.38,2.12)	0.07(0.03,0.10)	0.81(0.57,1.26)	0.18(0.12,0.29)	1.04(0.68,1.45)	0.13(0.09,0.18)	-0.68(-0.95,-0.41)	43.93(30.72,67.75)	6.76(4.70,10.53)	52.91(35.42,73.28)	5.30(3.57,7.29)	-0.45(-0.73,-0.17)
Ghana	339.83(278.69,412.74)	3.48(2.81,4.25)	807.11(666.42,999.67)	3.26(2.65,4.00)	0.28(-0.07,0.63)	19.42(11.17,36.74)	0.22(0.10,0.46)	25.94(14.16,44.39)	0.13(0.06,0.23)	-1.86(-1.99,-1.72)	1065.96(720.38,2056.29)	8.01(4.51,14.84)	1256.20(806.24,2061.56)	4.49(2.65,7.35)	-1.94(-2.07,-1.81)
Benin	79.68(65.51,98.38)	2.65(2.14,3.27)	215.66(176.28,267.46)	2.54(2.05,3.10)	0.69(0.18,1.20)	7.21(4.09,12.68)	0.21(0.08,0.43)	12.81(6.69,20.49)	0.15(0.06,0.27)	-0.96(-1.06,-0.86)	441.91(271.25,851.06)	7.98(4.18,14.04)	779.93(486.85,1192.33)	5.73(2.98,9.04)	-0.87(-1.00,-0.74)
South Africa	605.43(499.28,737.44)	2.19(1.78,2.66)	1266.71(1021.29,1543.69)	2.38(1.93,2.88)	0.19(0.13,0.24)	29.39(23.78,37.48)	0.11(0.08,0.14)	46.42(34.93,54.51)	0.09(0.07,0.11)	-0.22(-0.45,0.00)	1545.05(1219.88,1880.59)	4.50(3.66,5.65)	1931.64(1491.04,2297.19)	3.58(2.77,4.23)	-0.52(-0.76,-0.29)
Cameroon	163.71(134.97,200.21)	2.42(1.96,2.92)	491.60(402.64,606.62)	2.35(1.90,2.89)	0.34(0.01,0.68)	15.19(8.02,28.05)	0.24(0.09,0.48)	31.63(19.03,53.48)	0.17(0.08,0.31)	-1.11(-1.30,-0.92)	846.01(538.99,1528.18)	8.38(4.19,15.26)	1814.22(1238.00,2862.20)	6.27(3.78,10.57)	-0.74(-0.98,-0.49)
Chad	69.53(56.84,85.14)	1.79(1.44,2.20)	214.46(173.58,268.42)	2.13(1.71,2.63)	0.95(0.77,1.13)	11.43(5.25,24.29)	0.26(0.07,0.64)	27.39(14.59,48.71)	0.24(0.08,0.47)	-0.17(-0.33,0.00)	664.36(309.83,1315.97)	9.49(4.12,20.39)	1766.39(980.12,3155.62)	9.18(4.46,16.36)	-0.02(-0.18,0.14)
Gambia	13.43(10.99,16.91)	2.21(1.79,2.70)	32.73(26.76,40.54)	2.03(1.65,2.50)	0.17(-0.17,0.51)	1.34(0.64,2.34)	0.23(0.07,0.46)	2.57(1.17,4.68)	0.19(0.07,0.34)	-0.80(-0.94,-0.67)	79.08(46.16,145.35)	8.36(3.72,15.32)	134.09(70.03,241.32)	6.52(3.06,11.69)	-0.90(-1.09,-0.72)
Liberia	50.94(41.54,63.04)	3.09(2.53,3.79)	82.42(67.47,103.25)	2.21(1.79,2.73)	0.29(-0.38,0.97)	5.45(3.36,9.86)	0.27(0.11,0.53)	5.94(2.59,10.70)	0.19(0.07,0.36)	-1.25(-1.36,-1.14)	353.51(202.42,710.97)	11.46(6.85,20.21)	339.24(172.73,574.71)	6.94(3.10,12.33)	-1.51(-1.68,-1.34)
Guinea-Bissau	11.36(9.19,14.04)	1.81(1.46,2.20)	26.80(21.94,33.63)	2.07(1.68,2.53)	0.89(0.68,1.11)	2.10(1.22,3.86)	0.32(0.13,0.60)	2.67(1.33,4.67)	0.23(0.10,0.42)	-0.97(-1.06,-0.88)	126.06(74.12,251.84)	12.24(6.65,22.93)	152.94(84.96,260.81)	8.52(4.19,14.99)	-1.02(-1.18,-0.87)
Guinea	87.53(71.35,106.96)	2.07(1.68,2.53)	194.87(159.49,238.51)	2.25(1.83,2.71)	0.76(0.52,1.00)	12.97(6.91,26.56)	0.26(0.09,0.57)	18.55(9.16,32.09)	0.21(0.08,0.41)	-0.52(-0.66,-0.38)	773.14(420.92,1603.46)	10.26(5.42,21.05)	1089.58(641.51,1802.89)	8.02(3.99,13.76)	-0.53(-0.70,-0.36)
Mauritania	24.84(20.24,30.61)	1.76(1.41,2.18)	75.35(61.16,93.19)	2.45(1.98,3.02)	0.78(0.53,1.03)	2.66(1.47,5.54)	0.20(0.09,0.46)	3.71(1.76,6.89)	0.14(0.06,0.28)	-1.19(-1.24,-1.14)	135.73(85.64,267.92)	6.92(3.84,14.05)	176.76(101.28,300.06)	4.73(2.40,8.52)	-1.27(-1.39,-1.15)
Togo	56.48(45.73,68.90)	2.59(2.09,3.15)	121.10(98.24,150.40)	2.05(1.66,2.51)	-0.40(-0.77,-0.03)	4.90(2.83,9.38)	0.22(0.09,0.45)	8.78(4.03,14.62)	0.18(0.07,0.31)	-0.71(-0.85,-0.57)	304.69(194.91,569.82)	8.38(4.43,15.55)	459.61(236.88,734.42)	6.36(3.03,10.38)	-0.82(-0.97,-0.66)
Côte d'Ivoire	172.97(140.86,213.56)	2.31(1.86,2.81)	377.02(304.79,469.32)	2.01(1.64,2.45)	-0.27(-0.50,-0.03)	17.46(10.28,29.87)	0.24(0.09,0.47)	30.73(15.98,49.62)	0.18(0.07,0.32)	-0.90(-1.02,-0.79)	1113.78(728.81,1989.23)	8.96(4.77,15.04)	1818.26(1113.87,2742.29)	6.79(3.56,10.99)	-0.70(-0.84,-0.55)
Mali	122.56(100.81,149.58)	2.16(1.75,2.60)	313.64(256.74,388.05)	2.17(1.75,2.65)	0.04(-0.22,0.31)	14.44(7.68,29.96)	0.23(0.08,0.55)	27.38(12.76,52.77)	0.18(0.06,0.38)	-0.66(-0.71,-0.60)	879.11(465.26,1796.78)	9.00(4.50,19.24)	1667.08(917.76,2937.56)	6.95(3.08,13.92)	-0.69(-0.76,-0.62)
Senegal	150.43(123.77,185.54)	3.06(2.48,3.73)	268.26(221.43,331.61)	2.37(1.92,2.90)	-1.15(-1.64,-0.65)	13.45(7.37,24.52)	0.25(0.09,0.49)	17.87(7.15,31.77)	0.18(0.06,0.33)	-1.00(-1.13,-0.87)	820.39(535.36,1574.96)	9.81(5.09,17.60)	904.41(433.44,1527.52)	6.40(2.74,11.21)	-1.24(-1.46,-1.03)
Nigeria	1482.63(1218.60,1826.78)	2.39(1.93,2.92)	5343.65(4375.67,6636.13)	3.66(2.95,4.50)	1.74(1.54,1.95)	161.22(92.49,296.33)	0.25(0.09,0.52)	227.64(153.30,332.36)	0.14(0.07,0.23)	-2.05(-2.24,-1.87)	9447.10(6711.94,19378.88)	9.36(5.30,16.75)	15080.70(10536.54,21577.96)	6.04(4.07,8.84)	-1.49(-1.67,-1.30)
Sao Tome and Principe	1.66(1.36,2.04)	2.01(1.63,2.49)	4.03(3.29,5.04)	2.44(1.98,3.01)	0.94(0.78,1.09)	0.15(0.08,0.30)	0.16(0.06,0.37)	0.17(0.06,0.32)	0.13(0.05,0.24)	-0.70(-0.83,-0.57)	8.73(5.34,17.62)	6.57(3.75,12.34)	7.75(3.30,15.46)	4.36(1.85,8.40)	-1.25(-1.42,-1.07)
Niger	89.90(73.06,111.91)	1.90(1.52,2.33)	301.69(247.07,374.74)	2.16(1.74,2.65)	0.70(0.51,0.90)	14.68(7.11,27.46)	0.28(0.08,0.70)	30.57(10.78,61.19)	0.23(0.05,0.52)	-0.63(-0.70,-0.57)	954.57(461.38,1825.10)	10.39(4.50,20.95)	1835.09(768.47,3526.14)	7.69(2.46,15.66)	-0.94(-1.04,-0.84)
Sierra Leone	57.90(46.90,70.98)	2.01(1.61,2.44)	131.00(106.08,162.81)	2.18(1.76,2.71)	0.60(0.25,0.94)	9.89(5.99,17.96)	0.27(0.12,0.49)	12.38(6.57,20.64)	0.20(0.08,0.34)	-1.04(-1.17,-0.90)	644.32(352.66,1346.10)	11.59(6.90,19.85)	774.42(456.65,1267.76)	8.24(4.47,13.62)	-1.08(-1.22,-0.94)
American Samoa	0.76(0.62,0.96)	2.13(1.73,2.63)	1.01(0.82,1.23)	2.01(1.62,2.46)	0.11(0.00,0.22)	0.04(0.03,0.08)	0.17(0.12,0.39)	0.05(0.03,0.12)	0.13(0.07,0.28)	-0.85(-0.89,-0.82)	1.93(1.36,3.44)	5.13(3.63,10.00)	1.93(1.12,3.72)	4.15(2.45,8.06)	-0.59(-0.62,-0.55)
Greenland	0.75(0.61,0.93)	1.60(1.30,1.95)	0.87(0.69,1.09)	1.32(1.06,1.62)	-0.62(-0.82,-0.42)	0.29(0.13,0.38)	0.77(0.38,0.99)	0.10(0.08,0.16)	0.19(0.15,0.30)	-5.24(-5.56,-4.91)	16.00(6.46,22.97)	31.58(13.61,44.07)	3.78(2.78,5.57)	7.06(5.05,10.16)	-5.50(-5.83,-5.16)
Cook Islands	0.36(0.30,0.44)	2.29(1.87,2.77)	0.46(0.38,0.57)	2.17(1.77,2.68)	0.12(0.01,0.22)	0.04(0.03,0.07)	0.26(0.19,0.54)	0.03(0.02,0.07)	0.14(0.08,0.33)	-2.40(-2.53,-2.27)	1.71(1.25,3.01)	9.83(7.25,17.61)	0.94(0.58,1.98)	5.26(3.14,10.93)	-2.60(-2.81,-2.38)
Bermuda	1.87(1.50,2.30)	2.89(2.34,3.56)	2.58(2.06,3.23)	2.73(2.22,3.32)	-0.28(-0.38,-0.18)	1.04(0.89,1.21)	1.73(1.49,2.01)	0.74(0.62,0.91)	0.57(0.48,0.69)	-4.71(-5.27,-4.14)	33.81(29.51,39.47)	55.52(48.52,64.73)	15.59(13.17,18.87)	15.69(13.06,19.07)	-5.13(-5.62,-4.63)
Nauru	0.13(0.10,0.16)	1.71(1.38,2.09)	0.14(0.11,0.17)	1.63(1.32,1.98)	0.15(0.05,0.25)	0.02(0.01,0.04)	0.31(0.20,0.63)	0.02(0.01,0.04)	0.37(0.24,1.00)	0.57(0.20,0.94)	0.94(0.59,1.81)	10.68(6.85,20.99)	0.90(0.52,1.81)	10.30(6.33,22.74)	-0.07(-0.47,0.34)
Guam	2.48(2.00,3.09)	2.20(1.77,2.67)	3.78(3.06,4.67)	2.06(1.69,2.51)	0.07(-0.03,0.17)	0.11(0.08,0.23)	0.15(0.10,0.35)	0.10(0.05,0.22)	0.06(0.03,0.12)	-2.33(-2.68,-1.98)	5.22(3.76,9.73)	4.52(3.26,8.95)	4.21(2.27,8.18)	2.53(1.37,4.91)	-1.12(-1.40,-0.84)
Monaco	1.64(1.32,2.06)	3.37(2.75,4.16)	2.37(1.90,2.95)	3.66(3.00,4.47)	0.40(0.35,0.45)	0.12(0.08,0.17)	0.18(0.13,0.25)	0.14(0.09,0.21)	0.15(0.10,0.21)	-0.62(-0.82,-0.41)	2.51(1.86,3.38)	5.54(4.21,7.60)	2.79(1.90,3.85)	4.46(3.07,6.12)	-0.90(-1.12,-0.67)
Palau	0.27(0.22,0.33)	2.05(1.65,2.49)	0.41(0.32,0.50)	1.84(1.50,2.24)	-0.03(-0.15,0.10)	0.02(0.01,0.04)	0.19(0.11,0.42)	0.02(0.01,0.05)	0.13(0.06,0.30)	-1.12(-1.19,-1.04)	0.82(0.45,1.60)	6.30(3.58,12.73)	0.76(0.38,1.58)	4.37(2.21,9.17)	-1.05(-1.13,-0.98)
Northern Mariana Islands	0.82(0.65,1.06)	2.24(1.81,2.74)	1.13(0.91,1.40)	2.11(1.72,2.56)	0.08(-0.01,0.17)	0.03(0.02,0.06)	0.13(0.08,0.30)	0.05(0.03,0.11)	0.11(0.07,0.28)	-0.54(-0.67,-0.41)	1.36(0.83,2.57)	3.90(2.39,7.66)	1.68(1.05,3.40)	3.36(2.06,6.99)	-0.46(-0.55,-0.38)
Niue	0.05(0.04,0.06)	2.19(1.78,2.66)	0.04(0.03,0.05)	1.99(1.62,2.44)	-0.02(-0.14,0.09)	0.01(0.00,0.01)	0.26(0.17,0.61)	0.00(0.00,0.01)	0.23(0.14,0.52)	-1.18(-1.47,-0.89)	0.19(0.12,0.38)	8.31(5.42,16.73)	0.17(0.10,0.35)	11.14(7.04,23.27)	-0.53(-1.06,0.00)
Saint Kitts and Nevis	0.88(0.71,1.07)	2.34(1.90,2.84)	1.36(1.09,1.71)	1.97(1.60,2.41)	-0.54(-0.64,-0.44)	0.08(0.07,0.11)	0.21(0.18,0.28)	0.04(0.03,0.05)	0.07(0.06,0.09)	-4.22(-4.85,-3.59)	3.19(2.78,4.48)	8.12(7.10,11.40)	1.38(1.14,1.70)	2.32(1.90,2.81)	-4.95(-5.50,-4.39)
Puerto Rico	100.46(79.90,122.14)	2.76(2.20,3.36)	126.21(101.26,157.57)	2.62(2.10,3.18)	-0.26(-0.36,-0.16)	20.85(19.19,22.59)	0.60(0.55,0.65)	6.06(5.04,7.15)	0.10(0.08,0.12)	-6.64(-7.04,-6.24)	832.48(772.61,898.66)	23.73(22.03,25.57)	158.46(132.47,185.01)	3.98(3.33,4.67)	-6.72(-7.15,-6.30)
San Marino	1.07(0.86,1.33)	3.58(2.91,4.42)	1.99(1.62,2.50)	3.85(3.14,4.70)	0.31(0.28,0.33)	0.04(0.02,0.08)	0.10(0.07,0.22)	0.04(0.03,0.11)	0.05(0.03,0.12)	-1.34(-1.68,-0.99)	0.88(0.67,1.65)	3.20(2.46,5.88)	0.91(0.59,1.90)	1.61(1.07,3.13)	-1.45(-1.69,-1.21)
Tokelau	0.03(0.02,0.03)	1.87(1.53,2.29)	0.03(0.02,0.03)	1.95(1.58,2.39)	0.78(0.54,1.02)	0.00(0.00,0.01)	0.29(0.18,0.61)	0.00(0.00,0.01)	0.29(0.18,0.73)	-1.04(-1.37,-0.70)	0.13(0.08,0.25)	9.27(5.82,17.72)	0.16(0.10,0.37)	13.26(8.10,31.56)	-0.75(-1.46,-0.05)
Tuvalu	0.16(0.13,0.19)	1.95(1.58,2.41)	0.20(0.16,0.24)	1.69(1.36,2.09)	-0.15(-0.26,-0.04)	0.03(0.01,0.05)	0.37(0.22,0.77)	0.02(0.01,0.05)	0.23(0.15,0.52)	-1.60(-1.63,-1.57)	1.20(0.69,2.28)	12.52(7.35,23.75)	0.83(0.54,1.59)	7.30(4.76,14.38)	-1.72(-1.77,-1.68)
United States Virgin Islands	2.57(2.08,3.15)	2.58(2.08,3.15)	3.10(2.48,3.88)	2.44(1.97,2.95)	-0.27(-0.38,-0.16)	0.37(0.22,0.47)	0.42(0.24,0.53)	0.20(0.14,0.36)	0.16(0.11,0.26)	-3.14(-3.46,-2.81)	17.57(10.18,22.30)	16.97(9.78,21.31)	6.06(4.33,8.63)	6.40(4.53,8.82)	-3.04(-3.38,-2.69)
South Sudan	76.52(62.24,95.31)	1.98(1.58,2.48)	117.69(95.08,146.83)	1.85(1.49,2.26)	-0.60(-0.83,-0.37)	15.06(7.73,29.26)	0.32(0.14,0.68)	16.92(8.78,30.28)	0.24(0.09,0.44)	-1.11(-1.44,-0.78)	973.53(439.98,1977.29)	13.88(7.57,26.60)	1105.76(627.72,2079.55)	10.34(5.26,18.60)	-0.98(-1.43,-0.53)
Sudan	236.98(193.55,292.70)	1.74(1.40,2.15)	531.02(438.55,667.25)	1.68(1.37,2.05)	0.03(-0.16,0.21)	71.78(36.53,131.77)	0.37(0.20,0.70)	123.99(59.59,183.20)	0.42(0.18,0.61)	1.06(0.66,1.45)	5213.47(2386.85,10407.31)	18.24(9.41,32.75)	7551.16(3740.14,11346.37)	17.35(8.60,25.58)	0.61(0.15,1.07)

## Sheet: Tab.S3
Table S3. Global and Male/Female AAPC of PAH
		Btoh Gender	Male	Female
Incidence
	AAPC	-0.001（-0.001，-0.001）	0.001（0.001,0.001）	-0.002（-0.002，-0.003）
	Slope1	-0.101(-0.118,-0.084)	-0.001(-0.023,0.020)	-0.136(-0.161,-0.112)
	Slope2	0.403(0.322,0.484)	0.543(0.442,0.645)	0.319(0.203,0.436)
	Slope3	0.023(0.009,0.036)	0.145(0.126,0.164)	-0.040(-0.057,-0.023)
	Slope4	-0.544(-0.625,-0.464)	-0.433(-0.504,-0.362)	-0.690(-0.871,-0.507)
Deaths
	AAPC	-0.003（-0.002，-0.003）	-0.004（-0.003，-0.004）	-0.002（-0.002，-0.002）
	Slope1	-0.604(-0.651,-0.557)	-1.066(-1.139,-0.993)	-0.206(-0.261,-0.151)
	Slope2	1.971(1.536,2.408)	2.041(1.710,2.374)	-0.714(-1.234,-0.190)
	Slope3	-2.391(-2.512,-2.270)	-3.044(-3.248,-2.840)	1.390(1.152,1.629)
	Slope4	-1.906(-3.225,-0.570)	-1.808(-3.681,0.101)	-1.984(-2.053,-1.915)
DALYs
	AAPC	-0.164（-0.161，-0.161）	-0.199（-0.196，-0.202）	-0.128（-0.125，-0.131）
	Slope1	-1.010(-1.625,-0.392)	-1.314(-2.043,-0.580)	-1.022(-1.059,-0.985)
	Slope2	-1.399(-1.463,-1.335)	-1.773(-1.859,-1.687)	0.398(0.058,0.738)
	Slope3	0.156(-0.054,0.367)	0.148(-0.051,0.346)	-1.476(-2.002,-0.947)
	Slope4	-2.829(-2.923,-2.734)	-3.273(-3.384,-3.161)	-2.490(-2.604,-2.376)

## Sheet: Tab.S4
Table S4. Frontier analysis of PAH in all countries and regions
	DALYs
	val	SDI	frontier	effect difference
China	8.949533821315686	0.721629759719777	0.360258947584095	8.589274873731592
Democratic People's Republic of Korea	8.039653313178206	0.569854634067777	1.836730902154284	6.202922411023922
Taiwan (Province of China)	4.185682196815174	0.874747053187929	0.3606554466705744	3.8250267501446
Cambodia	4.91772992336021	0.473621490708013	2.884171121406139	2.033558801954071
Indonesia	4.613936293825213	0.656868336261681	0.3599349824788017	4.254001311346411
Lao People's Democratic Republic	6.650130790451225	0.489136091456599	2.450209245737742	4.199921544713483
Malaysia	2.476557014224104	0.742523828414751	0.3605059899268622	2.116051024297242
Maldives	7.481969358319284	0.650886627343107	0.3604766676949537	7.12149269062433
Myanmar	6.760440682814494	0.533900839611906	1.827261884452596	4.933178798361898
Philippines	3.276434188863357	0.651219328702707	0.3592234979386986	2.917210690924658
Sri Lanka	15.14003044004001	0.70153493519423	0.3602266034750778	14.77980383656493
Thailand	3.08507371621434	0.682547932974593	0.3579945219808756	2.727079194233464
Timor-Leste	6.286817140262313	0.444667618881833	4.0369462866895	2.249870853572813
Viet Nam	3.804393828310216	0.627933720680671	0.3581525173734892	3.446241310936727
Fiji	5.173663822230875	0.675051630810876	0.3609780504784057	4.812685771752469
Kiribati	8.087582123015753	0.527186582842681	1.835564904951695	6.252017218064059
Marshall Islands	8.040637737112972	0.574091128177309	1.828156813279042	6.21248092383393
Micronesia (Federated States of)	7.482337543684708	0.587534967103163	1.824774951822089	5.65756259186262
Papua New Guinea	11.3108521807662	0.417797443084353	4.548745336869838	6.762106843896357
Samoa	6.556357729286768	0.593392769469481	1.788221399361314	4.768136329925454
Solomon Islands	6.31403953422961	0.429360316406646	4.342459680165281	1.971579854064329
Tonga	4.457556755079001	0.626349935807987	0.3587546708951442	4.098802084183857
Vanuatu	7.800245427854958	0.473100705820327	2.939940207754685	4.860305220100273
Armenia	2.178072208613155	0.701833194147139	0.3600790002793393	1.817993208333815
Azerbaijan	17.64293674972301	0.694851274415291	0.3618407953582329	17.28109595436477
Georgia	27.83475196318454	0.732473604476306	0.3594969277406057	27.47525503544393
Kazakhstan	1.488034175095515	0.725144495100349	0.359744825220713	1.128289349874803
Kyrgyzstan	1.763457897397751	0.603979328412055	1.752799400547493	0.01065849685025877
Mongolia	43.92348606123035	0.617621564638127	0.458913830118547	43.4645722311118
Tajikistan	27.43214146034781	0.541511187051998	1.823865579964325	25.60827588038349
Turkmenistan	7.854453930347942	0.682160775869611	0.3592308508840323	7.49522307946391
Uzbekistan	12.20414296779907	0.662621694181816	0.3624872535077553	11.84165571429132
Albania	8.434795951416513	0.706849790878611	0.3597647714844063	8.075031179932108
Bosnia and Herzegovina	5.908871443693357	0.72307789321024	0.3597314708419662	5.549139972851391
Bulgaria	2.865154351736313	0.768150939342518	0.3618099527231295	2.503344399013184
Croatia	1.307740411785579	0.798341026936276	0.3605274795364539	0.9472129322491252
Czechia	11.11216437619899	0.828450433122785	0.3592270563351063	10.75293731986389
Hungary	4.657951775156487	0.790754768173338	0.3600817943364613	4.297869980820026
North Macedonia	3.175325857274008	0.750629703270047	0.3617986990379575	2.813527158236051
Montenegro	1.050462482189869	0.795800584021403	0.3593896778130295	0.6910728043768393
Poland	3.94638199343893	0.812042808667712	0.3622314398693867	3.584150553569544
Romania	13.91614775958462	0.768453864365965	0.3584766271217851	13.55767113246284
Serbia	2.433464292934196	0.792416293685483	0.3587017365014874	2.074762556432709
Slovakia	2.038593985160133	0.810610529921693	0.36129278778489	1.677301197375243
Slovenia	1.034285529643937	0.842430731281465	0.360634649841597	0.6736508798023404
Belarus	1.625038948298701	0.784484710906639	0.3590688481069926	1.265970100191708
Estonia	1.117224017845848	0.844917787360624	0.3607044345193244	0.7565195833265235
Latvia	2.887606985511481	0.830663516299797	0.3590100036289527	2.528596981882528
Lithuania	2.30228210585879	0.856484049109405	0.3604202698898827	1.941861835968907
Republic of Moldova	0.5448458319887814	0.732214875427507	0.3597940439055624	0.1850517880832191
Russian Federation	3.621326193690657	0.808536004906566	0.3597316666332456	3.261594527057412
Ukraine	3.053314843988397	0.760773912846782	0.359755243162323	2.693559600826074
Brunei Darussalam	11.44432844171321	0.810234366947283	0.3589433889265862	11.08538505278662
Japan	10.72195175601109	0.871241812572128	0.3613978199697149	10.36055393604138
Republic of Korea	2.398488638509595	0.886675266756997	0.3605912665017399	2.037897372007855
Singapore	3.8269683123362	0.856097766112729	0.3604506830038894	3.46651762933231
Australia	3.688513815309344	0.844252813727575	0.3607764211239339	3.32773739418541
New Zealand	3.554324426751124	0.849442498970719	0.3610076556026116	3.193316771148512
Andorra	3.55149294657611	0.869444112735696	0.3610186356339553	3.190474310942154
Austria	3.465701989440743	0.853837004256539	0.3595655564993177	3.106136432941425
Belgium	5.17531833603066	0.853654015777112	0.3601532294555	4.81516510657516
Cyprus	17.44879081321609	0.835630545002355	0.359796085903635	17.08899472731246
Denmark	4.804250084772971	0.896424204101212	0.3602568539807962	4.443993230792175
Finland	2.132598958195461	0.859831367662218	0.3581391294958311	1.77445982869963
France	6.052774478552727	0.838364875196954	0.3607088336262741	5.692065644926452
Germany	6.421321756749593	0.902957091057572	0.3591220491810977	6.062199707568496
Greece	8.349846390515818	0.791854407912829	0.3599041833074618	7.989942207208356
Iceland	3.794980598314191	0.876361679802766	0.3598559251414783	3.435124673172713
Ireland	3.023847824628986	0.873753849787408	0.3623268478450518	2.661520976783934
Israel	7.175358927475129	0.809011651557631	0.3590319807900335	6.816326946685095
Italy	2.777455463469898	0.805773533613512	0.3608862552664059	2.416569208203492
Luxembourg	5.060914175758188	0.884428955125693	0.358900349678906	4.702013826079282
Malta	2.895134701906964	0.801585033998971	0.3605285659671313	2.534606135939833
Netherlands	3.911869802792614	0.888464256397732	0.358908329157376	3.552961473635238
Norway	1.922326227921893	0.916132810119013	0.3603095854180272	1.562016642503866
Portugal	5.816337316417764	0.744151850665712	0.3585898740939316	5.457747442323832
Spain	5.999333075264193	0.769283697979998	0.3613554714078912	5.637977603856302
Sweden	4.137220409007647	0.886880298870342	0.35970985092841	3.777510558079237
Switzerland	5.12409119192152	0.933059110986638	0.360949689904926	4.763141502016595
United Kingdom	3.728039051798896	0.859000181772086	0.3608141695925468	3.36722488220635
Argentina	7.119021025605789	0.723122972582249	0.3606958551673407	6.758325170438448
Chile	5.449861358552586	0.771514715903929	0.3609932276847965	5.088868130867789
Uruguay	5.442102711437224	0.719283444839432	0.3596393686953158	5.082463342741908
Canada	4.631880796076144	0.873170679735405	0.3594990575615848	4.27238173851456
United States of America	8.076566681834498	0.862448354015145	0.3596079678898945	7.716958713944603
Antigua and Barbuda	1.496300063025638	0.749886887369379	0.3613435621120211	1.134956500913617
Bahamas	14.75431569637785	0.805020667882124	0.3616275433881959	14.39268815298965
Barbados	11.87889120494371	0.746748764251474	0.3602131696644586	11.51867803527925
Belize	5.723718151161219	0.610229002222948	0.7250876705526755	4.998630480608544
Cuba	1.903369614112719	0.668729864363244	0.3601913923927257	1.543178221719994
Dominica	3.463835030327662	0.746967184749286	0.360650013471164	3.103185016856498
Dominican Republic	4.262456140064367	0.619388201281128	0.4702019197029221	3.792254220361445
Grenada	8.804803240855477	0.668993028326993	0.360279626388552	8.444523614466926
Guyana	16.06116288928765	0.650812335285137	0.359367245124117	15.70179564416354
Haiti	25.16587508602526	0.448278284992742	4.015676897228205	21.15019818879706
Jamaica	2.810488749458565	0.683263063531091	0.3612787072522899	2.449210042206275
Saint Lucia	8.359609805116543	0.672509735365292	0.3598571769743866	7.999752628142156
Saint Vincent and the Grenadines	2.446098701880754	0.637195962512539	0.3595873761842378	2.086511325696516
Suriname	14.25898209382422	0.63366573910901	0.3609290072977697	13.89805308652645
Trinidad and Tobago	7.716648192387955	0.768763253980677	0.3594411143251949	7.35720707806276
Bolivia (Plurinational State of)	9.021127927069529	0.5990107988623	1.772671823146105	7.248456103923424
Ecuador	5.80241589069221	0.66101705262103	0.3622446719964138	5.440171218695796
Peru	4.64900207473227	0.662054036755862	0.3593582555066016	4.289643819225669
Colombia	3.290918523863573	0.655442912568827	0.3590522270665951	2.931866296796978
Costa Rica	3.31487879787923	0.700340476999325	0.3589195257088732	2.955959272170357
El Salvador	4.184161287037877	0.563775187564695	1.82870670087865	2.355454586159227
Guatemala	2.359981504144766	0.539972423611408	1.810344115953747	0.5496373881910195
Honduras	5.304704300685347	0.513037248307344	2.02396743069581	3.280736869989537
Mexico	3.113487803711177	0.664575304259183	0.3588011046919661	2.754686699019211
Nicaragua	1.756900133539095	0.523958472235925	1.756900133539095	0
Panama	2.08203635000091	0.708864827518009	0.3592590674531089	1.722777282547801
Venezuela (Bolivarian Republic of)	1.831235110305783	0.596513058857335	1.762529683260479	0.06870542704530402
Brazil	10.44838269444255	0.65304388724724	0.3594562030869047	10.08892649135565
Paraguay	2.416946763083343	0.635718098852038	0.3593125183298504	2.057634244753492
Algeria	11.08690540415392	0.659500924324217	0.3598077919399878	10.72709761221393
Bahrain	4.516243814411944	0.753043204117567	0.3593300742325657	4.156913740179379
Egypt	16.51088014426782	0.6067870937016	1.330003678987993	15.18087646527983
Iran (Islamic Republic of)	16.26495367533207	0.697207397661899	0.3590916954328866	15.90586197989918
Iraq	5.199807628929702	0.662626230762701	0.3597330791034265	4.840074549826276
Jordan	2.451075029435596	0.725307226832443	0.3582376215326853	2.09283740790291
Kuwait	6.508042568598502	0.846651054742869	0.3603035004832863	6.147739068115216
Lebanon	11.26128496815879	0.74474635096338	0.3602184658905626	10.90106650226823
Libya	20.43241934237724	0.725771398888229	0.3607317137215215	20.07168762865572
Morocco	13.46148567081817	0.562698300927195	1.837106658613305	11.62437901220487
Palestine	4.655976309111008	0.631011665054344	0.3586100159472375	4.29736629316377
Oman	3.900484713133205	0.773391601871737	0.3595248384388024	3.540959874694403
Qatar	3.748522314370537	0.846860584038945	0.360656656946909	3.387865657423628
Saudi Arabia	2.621163903965847	0.815143493214829	0.3604176117705424	2.260746292195305
Syrian Arab Republic	2.32117131241111	0.62300407463119	0.3983122941158433	1.922859018295267
Tunisia	9.230114257155254	0.682432215876962	0.3592787258354166	8.870835531319837
Turkey	16.55504374408668	0.712692673098478	0.3600407089902066	16.19500303509647
United Arab Emirates	10.31087921172832	0.849317734035032	0.360987603494428	9.949891608233889
Yemen	19.30120923704412	0.450376375244811	3.920039705083389	15.38116953196073
Afghanistan	25.27867354552262	0.337199997837472	5.491102665699949	19.78757087982267
Bangladesh	8.655650379280624	0.492420884955353	2.343410964144744	6.312239415135879
Bhutan	9.27233454269762	0.473062378179926	2.945892380195366	6.326442162502254
India	7.748536611167206	0.575401649396992	1.825040131196457	5.923496479970749
Nepal	9.42443058474264	0.43317463481343	4.35558636774858	5.06884421699406
Pakistan	11.95701975642628	0.504028688613448	2.15443982960192	9.802579926824354
Angola	6.211355414889751	0.453721949492174	3.924465865542547	2.286889549347205
Central African Republic	8.91837315519519	0.309167689992842	6.021523757754859	2.896849397440332
Congo	4.804158900059869	0.583075236262154	1.827076636902571	2.977082263157299
Democratic Republic of the Congo	6.132278595473541	0.38317984920136	4.553367973512301	1.57891062196124
Equatorial Guinea	3.832422505036779	0.657857455522296	0.3597924498951642	3.472630055141615
Gabon	4.141638171423367	0.634691392755259	0.3602213304349634	3.781416840988404
Burundi	7.640448509715799	0.289374364823265	6.286352628510807	1.354095881204992
Comoros	5.916052966049956	0.475978688247514	2.869277128124498	3.046775837925458
Djibouti	5.675981398236311	0.4879583707169	2.429120986064021	3.246860412172289
Eritrea	8.006203478592557	0.403863942828898	4.555929885915932	3.450273592676625
Ethiopia	5.52745614349443	0.358823295416803	4.80540997078815	0.7220461727062801
Kenya	4.052314291658713	0.523768077100117	1.888848962622387	2.163465329036327
Madagascar	12.80445580638087	0.40024694263784	4.556951692926149	8.247504113454724
Malawi	6.170947996617843	0.384553633730301	4.555535932476471	1.615412064141372
Mauritius	28.95843301717181	0.718260445552653	0.3599612933768105	28.598471723795
Mozambique	8.592171261759411	0.326462613636377	5.802729889026092	2.789441372733319
Rwanda	6.165621545676915	0.435588705789772	4.323314996777059	1.842306548899856
Seychelles	2.862849799888261	0.730150774629382	0.3577974461754255	2.505052353712836
Somalia	10.57952412646666	0.0776881089723748	10.57952412646666	0
United Republic of Tanzania	6.274269544343651	0.446568273334685	4.021668264915266	2.252601279428386
Uganda	5.984769485072568	0.423261181495743	4.571719660352785	1.413049824719783
Zambia	8.639736504482125	0.505948954434909	2.165618727347041	6.474117777135084
Botswana	4.039825077490534	0.642721628921122	0.3588857168074382	3.680939360683095
Lesotho	5.398213356220974	0.510393065681381	2.077399318160016	3.320814038060957
Namibia	4.855064999802834	0.617564872149664	0.6330135474939755	4.222051452308858
South Africa	3.577974454296887	0.679626598156588	0.3598967404022941	3.218077713894593
Eswatini	5.302258271743823	0.58545971329224	1.823910716159307	3.478347555584516
Zimbabwe	7.158429200144396	0.473819486202707	2.95716184353039	4.201267356614006
Benin	5.726097839844225	0.373486574239249	4.655499483942094	1.070598355902131
Burkina Faso	8.976189427561813	0.285118401552141	6.299905322480781	2.676284105081032
Cameroon	6.266930665211969	0.479691223419746	2.740920402249179	3.526010262962791
Cabo Verde	4.407404121343501	0.53353453903661	1.836739729722019	2.570664391621482
Chad	9.178960487079392	0.240436018662427	7.189667973947762	1.989292513131629
Côte d'Ivoire	6.792583676290779	0.425941883067361	4.562305992345622	2.230277683945157
Gambia	6.524971619808673	0.40971415951073	4.551712445676241	1.973259174132432
Ghana	4.487941387090792	0.564930389658009	1.833709142106685	2.654232244984107
Guinea	8.017240731253729	0.33640129335069	5.481966867910166	2.535273863343563
Guinea-Bissau	8.520118924000002	0.353109621364536	4.871691292819658	3.648427631180344
Liberia	6.936011268512806	0.352442451643965	4.867364686068544	2.068646582444263
Mali	6.950597884456015	0.268579940925684	6.509615140219233	0.4409827442367824
Mauritania	4.734875360012317	0.498945100442996	2.221284222614434	2.513591137397882
Niger	7.693383103824417	0.168072773803995	7.693383103824417	0
Nigeria	6.037645546733292	0.503390832763244	2.151619510337458	3.886026036395834
Sao Tome and Principe	4.362051006751445	0.505413746708186	2.142866225471102	2.219184781280343
Senegal	6.403488070494957	0.408054192634391	4.558504273424979	1.844983797069978
Sierra Leone	8.236594280972918	0.3586658807038	4.867145885590568	3.36944839538235
Togo	6.358767056500806	0.408533695477986	4.557758844320808	1.801008212179998
American Samoa	4.152082712884172	0.723727533059592	0.3587156453482376	3.793367067535935
Bermuda	15.69344734029025	0.821365422389484	0.3602354541886239	15.33321188610163
Cook Islands	5.259560404431038	0.779109954659683	0.3599770798191726	4.899583324611865
Greenland	7.061928673206304	0.82621033634361	0.3607727315276318	6.701155941678672
Guam	2.534622077987942	0.803982202863145	0.3593888612812813	2.175233216706661
Monaco	4.463050243408433	0.908262830989574	0.3601789989610882	4.102871244447345
Nauru	10.30057773364039	0.625177833565553	0.3608585767962133	9.939719156844179
Niue	11.13955710340329	0.726222049709539	0.3608019899896769	10.77875511341361
Northern Mariana Islands	3.362894656704569	0.771535213383281	0.3588714277474895	3.004023228957079
Palau	4.365457789344775	0.75404693141209	0.3607912088858277	4.004666580458947
Puerto Rico	3.978480238472152	0.825525846914029	0.3602442130749444	3.618236025397207
Saint Kitts and Nevis	2.317595756488512	0.754987054945241	0.3612922765488581	1.956303479939654
San Marino	1.610113207222815	0.888005473958106	0.3620199979555902	1.248093209267225
Tokelau	13.25631534655181	0.68642562083005	0.3604564531399196	12.89585889341189
Tuvalu	7.297353721789076	0.576620529344684	1.825647365805713	5.471706355983363
United States Virgin Islands	6.403151363749868	0.821830853383701	0.359333573370979	6.043817790378888
South Sudan	10.3424638070768	0.278371125484101	6.5444194763498	3.798044330727004
Sudan	17.34712320601367	0.54194973514933	1.832724237592322	15.51439896842134
